# Supplementary material for: Identification of the probable structure of the sAPPα-GABABR1a complex and theoretical solutions for such cases
Source: Royal Society of Chemistry journal article supplement (doi:10.1039/d2cp00569g), 2022-01-01
Supplement: d2cp00569g4.pdf [file d2cp00569g4.pdf]

# Supporting Information

## Identification for Probable Structure of sAPP $\alpha$ -GABABR1a

### Complex and Theoretical Solutions for Such Cases

Huijuan Yang, Jinfei Mei, Wen Xu, Xiaohong Ma, Bo Sun, and Hongqi Ai\*

*School of Chemistry and Chemical Engineering, University of Jinan, Jinan 250022, PR China*

\*To whom correspondence should be addressed, E-mail: *chm\_aihq@ujn.edu.cn*

## Contents

|                                   |               |
|-----------------------------------|---------------|
| 1. Analysis methods details       | Pages S2-S4   |
| 2. Table S1                       | Page S5       |
| 3. Table S2 (2NC coordinate file) | Pages S6-S51  |
| 4. Figures S1-S7                  | Pages S52-S55 |

## ANALYSIS METHOD DETAILS

**Trajectory Analysis.** We used the rms and rmsf option to get the RMSD and RMSF analysis of C $\alpha$  atoms in the APP9mer-SD1 complexes, respectively. The hydrogen bond (H-bond) was considered with the hbond option, which was recognized when the cutoff distance was less than 0.35nm and the truncation of angle was less than 30° between APP9mer and SD1. The salt-bridge was considered with the saltar option to be recognized when the distance of the two charged groups from different parts was less than 0.3 nm.<sup>1</sup>

**PCA and FEL.** The main motions can be described in several main modes in MD simulation.<sup>2</sup> PCA (principal component analysis) can provide a detailed picture of the motion of a biomolecule and calculate its eigenvalues and eigenvectors by reducing the dimension.<sup>3-4</sup> When selecting groups to analyze, we were only interested in the backbone behavior of the first two main components (PC1 and PC2) of the APPmer-SD1 for eliminating the interference of side chain atoms.<sup>4-6</sup> The main components possessed high eigenvectors with eigenvalues. The free energy landscape (FEL) can describe the value of free energy and probability density P(x) of various conformations (X) of macromolecules. The free energy of whole complex was calculated as the equations below.<sup>7</sup>

$$\Delta G(X) = -k_B T \cdot \ln P(x) + A$$

Where  $\Delta G(X)$  is the change of free energy, and  $k_B$ ,  $P(x)$  and  $T$  indicate Boltzmann constant, probability distribution along a certain coordinate and simulation temperature, respectively.  $A$  is the constant term, which is related to the partition function. Undoubtedly, the simplified free energy landscape map is mainly used to analyze the composite conformation of the lowest energy with relatively large  $P(X)$ .<sup>8</sup> The dominant conformation was projected onto a two-dimensional plane in the form of clusters of points. The grid cell containing the most multipoint clusters was designated as the reference cell, and its free energy value is set to zero. Every frame covariance matrix, eigenvalue and eigenvector were generated using the gmx\_covar option by GROMACS and gmx\_anaeig option can project trajectories onto selected eigenvectors. In the end,

we will use the *ddtpd* package and the Sigmaplot software to draw the 2D/3D map of FEL.<sup>9</sup>

For the six complexes of APP9mer-SD1 in this study, each group will generate 8,000 structures, including solvated and non-solvated structures, which are used to construct their respective energy landscapes. Moreover, the value of P=0 is meaningless in the calculation formula of free energy when using 3D Cartesian coordinates to plot the graphs by principal component analysis method. So, we had only plotted the free energy landscapes with respect to the lowest energy (set to 0) of each system.

**MM/PBSA Binding Free Energy Calculations.** Molecular Mechanics/Poisson-Boltzmann Surface Area (MM/PBSA) is a widely used common method for post-processing MD trajectories to estimate the binding free energy.<sup>10-12</sup> Binding free energy is an important indicator to measure the binding strength effectively of the acceptor and ligand.<sup>13</sup> In the calculation, the solvent is regarded as a uniform continuum, and many frames in the equilibrium trajectory are averaged that based on the force field and an implicit continuum model.<sup>14</sup> In this method, the complex binding free energy ( $\Delta G_{\text{bind}}$ ) is given blow.<sup>15</sup>

$$\Delta G_{\text{bind}} = G_c - G_a - G_l$$

In the above formula,  $\Delta G_{\text{bind}}$ ,  $G_c$ ,  $G_a$ ,  $G_l$  represented the binding energy of the system, complex, acceptor and ligand, respectively. This mean divides the binding free energy into multiple calculations separately, and the specific decomposition is as follows:

$$\Delta G_{\text{bind}} = \Delta H - T\Delta S = \Delta E_{\text{MM}} + \Delta G_{\text{solv}} - T\Delta S$$

$$\Delta E_{\text{MM}} = \Delta E_{\text{VDW}} + \Delta E_{\text{COU}}$$

$$\Delta G_{\text{solv}} = \Delta G_{\text{PB}} + \Delta G_{\text{SA}}$$

Here, we can see clearly that  $\Delta G_{\text{bind}}$  consists of enthalpy changes ( $\Delta H$ ) and entropy changes ( $-T\Delta S$ ) of the system. In this work, difference of kinetic energy ( $\Delta E_{\text{MM}}$ ) and solvent effect term ( $\Delta G_{\text{solv}}$ ) before and after APP9mer-SD1 binding in vacuum is of importance for  $\Delta H$ . Meanwhile,  $\Delta E_{\text{MM}}$  and  $\Delta G_{\text{solv}}$  also is divided into two terms.  $\Delta E_{\text{COU}}$  is electrostatic interaction and  $\Delta E_{\text{VDW}}$  is van der Waals interactions between APP9mer

and SD1. <sup>16-17</sup> $\Delta G_{PB}$  and  $\Delta G_{SA}$ , respectively, represents the polar and non-polar solvation energy.  $\Delta E_{MM}$  is completed by the script itself,  $\Delta G_{PB}$  is completed by the APBS program, and the  $\Delta G_{SA}$  term is calculated by the following empirical formula:

$$\Delta G_{SA} = \gamma \text{SASA} + \beta$$

In which, SASA is the solution accessible surface area.<sup>17</sup> The values of  $\gamma$  and  $\beta$  are respectively 2.2kJ/(mol·nm<sup>2</sup>) and  $\beta=3.84$ kJ/mol. Furthermore,  $\Delta G_{bind}$  is a relative energy, the estimation of -T $\Delta$ S cannot significantly change the relative free energy, so the contribution of entropy is negligible.<sup>18</sup>

**Dynamic Cross-Correlation Map.** DCCM is usually used to detect the relative movement of residue pairs in complex structures. The mdmat option and xpm2ps tools of GROMACS was used to make residue contact maps to analyze the mutual mapping relationship of dynamic residue pairs. This method generally uses the covariance of the fluctuation of the C-alpha position of the skeleton atom. We took out a complex conformation every 1 ns from the equilibrium trajectory, then used the following equation to calculate the dynamic cross-correlation matrix  $C_{ij}$ :

$$C_{ij} = \frac{\langle \Delta r_i \cdot \Delta r_j \rangle}{\langle \Delta r_i^2 \cdot \Delta r_j^2 \rangle}$$

Among them, the term  $C_{ij}$  represents Cross-correlation coefficient.  $\Delta r_i$  is the average position of C-alpha of  $i^{\text{th}}$  residue in  $i^{\text{th}}$  residue,  $\Delta r_j$  is the average position of C-alpha of  $j^{\text{th}}$  residue of another component in  $j^{\text{th}}$  residue. Usually, a positive value of  $C_{ij}$  means the relative motion of the residue pair in the same direction; when the value is negative, it means the opposite direction.

**Table S1. FlexPepDocking Results**

|   | CN      |                                                                                     | NC      |                                                                                       |
|---|---------|-------------------------------------------------------------------------------------|---------|---------------------------------------------------------------------------------------|
|   | score   | conformation                                                                        | score   | conformation                                                                          |
| 1 | -24.155 |    | -21.678 |    |
| 2 | -23.819 |    | -17.994 |    |
| 3 | -23.043 |    | -17.806 |    |
| 4 | -22.998 |   | -16.167 |   |
| 5 | -22.955 |  | -16.106 |  |
| 6 | -22.919 |  | -15.734 |  |
| 7 | -21.596 |  | -15.637 |  |
| 8 | -21.623 |  | -14.822 |  |
| 9 | -21.465 |  | -14.612 |  |

10

-21.427

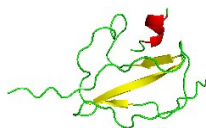

-14.440

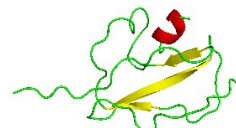**Table S2. Coordination file of sAPP $\alpha$ -SD1 in 2NC**

|      |      |    |       |       |       |
|------|------|----|-------|-------|-------|
| 0ACE | CH3  | 1  | 5.273 | 4.116 | 1.646 |
| 0ACE | HH31 | 2  | 5.347 | 4.192 | 1.679 |
| 0ACE | HH32 | 3  | 5.301 | 4.013 | 1.677 |
| 0ACE | HH33 | 4  | 5.289 | 4.127 | 1.537 |
| 0ACE | C    | 5  | 5.135 | 4.154 | 1.686 |
| 0ACE | O    | 6  | 5.040 | 4.083 | 1.654 |
| 1GLY | N    | 7  | 5.120 | 4.280 | 1.732 |
| 1GLY | HN   | 8  | 5.202 | 4.333 | 1.751 |
| 1GLY | CA   | 9  | 4.993 | 4.338 | 1.763 |
| 1GLY | HA1  | 10 | 5.003 | 4.445 | 1.751 |
| 1GLY | HA2  | 11 | 4.917 | 4.305 | 1.695 |
| 1GLY | C    | 12 | 4.948 | 4.314 | 1.903 |
| 1GLY | O    | 13 | 5.025 | 4.254 | 1.978 |
| 2PRO | N    | 14 | 4.832 | 4.359 | 1.941 |
| 2PRO | CD   | 15 | 4.764 | 4.461 | 1.863 |
| 2PRO | HD1  | 16 | 4.730 | 4.425 | 1.764 |
| 2PRO | HD2  | 17 | 4.825 | 4.554 | 1.856 |
| 2PRO | CA   | 18 | 4.758 | 4.326 | 2.060 |
| 2PRO | HA   | 19 | 4.802 | 4.388 | 2.136 |
| 2PRO | CB   | 20 | 4.614 | 4.364 | 2.025 |
| 2PRO | HB1  | 21 | 4.566 | 4.291 | 1.956 |
| 2PRO | HB2  | 22 | 4.542 | 4.385 | 2.107 |
| 2PRO | CG   | 23 | 4.639 | 4.493 | 1.947 |
| 2PRO | HG1  | 24 | 4.548 | 4.508 | 1.885 |
| 2PRO | HG2  | 25 | 4.654 | 4.583 | 2.010 |
| 2PRO | C    | 26 | 4.767 | 4.185 | 2.105 |

|      |      |    |       |       |       |
|------|------|----|-------|-------|-------|
| 2PRO | O    | 27 | 4.750 | 4.095 | 2.023 |
| 3THR | N    | 28 | 4.794 | 4.165 | 2.236 |
| 3THR | HN   | 29 | 4.790 | 4.236 | 2.305 |
| 3THR | CA   | 30 | 4.828 | 4.037 | 2.290 |
| 3THR | HA   | 31 | 4.922 | 4.018 | 2.241 |
| 3THR | CB   | 32 | 4.859 | 4.048 | 2.436 |
| 3THR | HB   | 33 | 4.779 | 4.115 | 2.474 |
| 3THR | OG1  | 34 | 4.990 | 4.101 | 2.448 |
| 3THR | HG1  | 35 | 5.003 | 4.184 | 2.402 |
| 3THR | CG2  | 36 | 4.854 | 3.913 | 2.509 |
| 3THR | HG21 | 37 | 4.898 | 3.917 | 2.611 |
| 3THR | HG22 | 38 | 4.747 | 3.891 | 2.528 |
| 3THR | HG23 | 39 | 4.914 | 3.835 | 2.457 |
| 3THR | C    | 40 | 4.730 | 3.926 | 2.270 |
| 3THR | O    | 41 | 4.615 | 3.932 | 2.312 |
| 4SER | N    | 42 | 4.777 | 3.822 | 2.198 |
| 4SER | HN   | 43 | 4.870 | 3.842 | 2.167 |
| 4SER | CA   | 44 | 4.719 | 3.695 | 2.168 |
| 4SER | HA   | 45 | 4.637 | 3.722 | 2.104 |
| 4SER | CB   | 46 | 4.814 | 3.610 | 2.081 |
| 4SER | HB1  | 47 | 4.829 | 3.665 | 1.986 |
| 4SER | HB2  | 48 | 4.904 | 3.594 | 2.144 |
| 4SER | OG   | 49 | 4.753 | 3.487 | 2.043 |
| 4SER | HG1  | 50 | 4.825 | 3.426 | 2.028 |
| 4SER | C    | 51 | 4.686 | 3.612 | 2.287 |
| 4SER | O    | 52 | 4.575 | 3.559 | 2.297 |
| 5GLU | N    | 53 | 4.778 | 3.596 | 2.384 |
| 5GLU | HN   | 54 | 4.872 | 3.625 | 2.372 |
| 5GLU | CA   | 55 | 4.761 | 3.510 | 2.497 |
| 5GLU | HA   | 56 | 4.686 | 3.438 | 2.465 |

|      |     |    |       |       |       |
|------|-----|----|-------|-------|-------|
| 5GLU | CB  | 57 | 4.883 | 3.424 | 2.532 |
| 5GLU | HB1 | 58 | 4.967 | 3.494 | 2.552 |
| 5GLU | HB2 | 59 | 4.868 | 3.363 | 2.624 |
| 5GLU | CG  | 60 | 4.912 | 3.329 | 2.416 |
| 5GLU | HG1 | 61 | 4.822 | 3.264 | 2.416 |
| 5GLU | HG2 | 62 | 4.928 | 3.384 | 2.321 |
| 5GLU | CD  | 63 | 5.030 | 3.235 | 2.439 |
| 5GLU | OE1 | 64 | 5.110 | 3.207 | 2.345 |
| 5GLU | OE2 | 65 | 5.045 | 3.182 | 2.552 |
| 5GLU | C   | 66 | 4.697 | 3.576 | 2.614 |
| 5GLU | O   | 67 | 4.723 | 3.549 | 2.731 |
| 6GLY | N   | 68 | 4.601 | 3.665 | 2.584 |
| 6GLY | HN  | 69 | 4.594 | 3.685 | 2.487 |
| 6GLY | CA  | 70 | 4.516 | 3.740 | 2.672 |
| 6GLY | HA1 | 71 | 4.480 | 3.828 | 2.620 |
| 6GLY | HA2 | 72 | 4.437 | 3.670 | 2.698 |
| 6GLY | C   | 73 | 4.579 | 3.799 | 2.793 |
| 6GLY | O   | 74 | 4.697 | 3.831 | 2.803 |
| 7CYS | N   | 75 | 4.491 | 3.813 | 2.894 |
| 7CYS | HN  | 76 | 4.394 | 3.803 | 2.873 |
| 7CYS | CA  | 77 | 4.524 | 3.837 | 3.031 |
| 7CYS | HA  | 78 | 4.629 | 3.849 | 3.053 |
| 7CYS | CB  | 79 | 4.471 | 3.965 | 3.097 |
| 7CYS | HB1 | 80 | 4.362 | 3.972 | 3.113 |
| 7CYS | HB2 | 81 | 4.520 | 3.976 | 3.197 |
| 7CYS | SG  | 82 | 4.517 | 4.104 | 2.989 |
| 7CYS | C   | 83 | 4.488 | 3.715 | 3.107 |
| 7CYS | O   | 84 | 4.373 | 3.670 | 3.108 |
| 8GLN | N   | 85 | 4.590 | 3.657 | 3.173 |
| 8GLN | HN  | 86 | 4.684 | 3.688 | 3.166 |



|      |      |     |       |       |       |
|------|------|-----|-------|-------|-------|
| 8GLN | CA   | 87  | 4.574 | 3.543 | 3.258 |
| 8GLN | HA   | 88  | 4.527 | 3.469 | 3.195 |
| 8GLN | CB   | 89  | 4.714 | 3.484 | 3.283 |
| 8GLN | HB1  | 90  | 4.776 | 3.563 | 3.331 |
| 8GLN | HB2  | 91  | 4.708 | 3.395 | 3.349 |
| 8GLN | CG   | 92  | 4.782 | 3.442 | 3.153 |
| 8GLN | HG1  | 93  | 4.712 | 3.388 | 3.086 |
| 8GLN | HG2  | 94  | 4.830 | 3.530 | 3.105 |
| 8GLN | CD   | 95  | 4.883 | 3.331 | 3.178 |
| 8GLN | OE1  | 96  | 4.863 | 3.210 | 3.164 |
| 8GLN | NE2  | 97  | 5.008 | 3.372 | 3.210 |
| 8GLN | HE21 | 98  | 5.022 | 3.470 | 3.229 |
| 8GLN | HE22 | 99  | 5.091 | 3.316 | 3.212 |
| 8GLN | C    | 100 | 4.489 | 3.559 | 3.379 |
| 8GLN | O    | 101 | 4.497 | 3.659 | 3.451 |
| 9ILE | N    | 102 | 4.407 | 3.458 | 3.412 |
| 9ILE | HN   | 103 | 4.409 | 3.377 | 3.353 |
| 9ILE | CA   | 104 | 4.321 | 3.459 | 3.527 |
| 9ILE | HA   | 105 | 4.336 | 3.549 | 3.584 |
| 9ILE | CB   | 106 | 4.178 | 3.457 | 3.481 |
| 9ILE | HB   | 107 | 4.161 | 3.527 | 3.397 |
| 9ILE | CG2  | 108 | 4.138 | 3.316 | 3.433 |
| 9ILE | HG21 | 109 | 4.119 | 3.241 | 3.513 |
| 9ILE | HG22 | 110 | 4.040 | 3.324 | 3.381 |
| 9ILE | HG23 | 111 | 4.208 | 3.284 | 3.353 |
| 9ILE | CG1  | 112 | 4.071 | 3.502 | 3.582 |
| 9ILE | HG11 | 113 | 3.970 | 3.484 | 3.542 |
| 9ILE | HG12 | 114 | 4.092 | 3.427 | 3.662 |
| 9ILE | CD   | 115 | 4.073 | 3.648 | 3.627 |
| 9ILE | HD1  | 116 | 4.154 | 3.653 | 3.703 |

|       |      |     |       |       |       |
|-------|------|-----|-------|-------|-------|
| 9ILE  | HD2  | 117 | 4.084 | 3.721 | 3.545 |
| 9ILE  | HD3  | 118 | 3.979 | 3.670 | 3.683 |
| 9ILE  | C    | 119 | 4.350 | 3.350 | 3.624 |
| 9ILE  | O    | 120 | 4.426 | 3.257 | 3.595 |
| 10ILE | N    | 121 | 4.310 | 3.366 | 3.751 |
| 10ILE | HN   | 122 | 4.266 | 3.452 | 3.775 |
| 10ILE | CA   | 123 | 4.314 | 3.273 | 3.859 |
| 10ILE | HA   | 124 | 4.421 | 3.266 | 3.876 |
| 10ILE | CB   | 125 | 4.258 | 3.335 | 3.984 |
| 10ILE | HB   | 126 | 4.261 | 3.253 | 4.059 |
| 10ILE | CG2  | 127 | 4.351 | 3.448 | 4.032 |
| 10ILE | HG21 | 128 | 4.326 | 3.483 | 4.134 |
| 10ILE | HG22 | 129 | 4.455 | 3.412 | 4.041 |
| 10ILE | HG23 | 130 | 4.349 | 3.531 | 3.958 |
| 10ILE | CG1  | 131 | 4.114 | 3.387 | 3.972 |
| 10ILE | HG11 | 132 | 4.100 | 3.452 | 4.062 |
| 10ILE | HG12 | 133 | 4.110 | 3.456 | 3.885 |
| 10ILE | CD   | 134 | 4.004 | 3.282 | 3.979 |
| 10ILE | HD1  | 135 | 4.033 | 3.201 | 4.050 |
| 10ILE | HD2  | 136 | 3.905 | 3.326 | 4.004 |
| 10ILE | HD3  | 137 | 4.003 | 3.233 | 3.879 |
| 10ILE | C    | 138 | 4.263 | 3.136 | 3.829 |
| 10ILE | O    | 139 | 4.190 | 3.108 | 3.734 |
| 11HIS | N    | 140 | 4.297 | 3.043 | 3.920 |
| 11HIS | HN   | 141 | 4.343 | 3.062 | 4.006 |
| 11HIS | CA   | 142 | 4.253 | 2.908 | 3.907 |
| 11HIS | HA   | 143 | 4.188 | 2.900 | 3.821 |
| 11HIS | CB   | 144 | 4.374 | 2.814 | 3.896 |
| 11HIS | HB1  | 145 | 4.458 | 2.847 | 3.962 |
| 11HIS | HB2  | 146 | 4.359 | 2.704 | 3.903 |

|       |     |     |       |       |       |
|-------|-----|-----|-------|-------|-------|
| 11HIS | ND1 | 147 | 4.359 | 2.728 | 3.659 |
| 11HIS | CG  | 148 | 4.421 | 2.806 | 3.754 |
| 11HIS | CE1 | 149 | 4.433 | 2.737 | 3.550 |
| 11HIS | HE1 | 150 | 4.413 | 2.699 | 3.450 |
| 11HIS | NE2 | 151 | 4.545 | 2.813 | 3.568 |
| 11HIS | HE2 | 152 | 4.618 | 2.800 | 3.502 |
| 11HIS | CD2 | 153 | 4.538 | 2.850 | 3.701 |
| 11HIS | HD2 | 154 | 4.627 | 2.896 | 3.743 |
| 11HIS | C   | 155 | 4.183 | 2.876 | 4.035 |
| 11HIS | O   | 156 | 4.210 | 2.942 | 4.135 |
| 12PRO | N   | 157 | 4.099 | 2.777 | 4.035 |
| 12PRO | CD  | 158 | 4.049 | 2.711 | 3.915 |
| 12PRO | HD1 | 159 | 4.138 | 2.679 | 3.856 |
| 12PRO | HD2 | 160 | 3.976 | 2.771 | 3.856 |
| 12PRO | CA  | 161 | 4.035 | 2.721 | 4.151 |
| 12PRO | HA  | 162 | 4.000 | 2.804 | 4.211 |
| 12PRO | CB  | 163 | 3.924 | 2.635 | 4.093 |
| 12PRO | HB1 | 164 | 3.889 | 2.553 | 4.159 |
| 12PRO | HB2 | 165 | 3.831 | 2.688 | 4.062 |
| 12PRO | CG  | 166 | 3.976 | 2.583 | 3.958 |
| 12PRO | HG1 | 167 | 4.054 | 2.505 | 3.974 |
| 12PRO | HG2 | 168 | 3.892 | 2.562 | 3.888 |
| 12PRO | C   | 169 | 4.122 | 2.636 | 4.237 |
| 12PRO | O   | 170 | 4.220 | 2.585 | 4.182 |
| 13PRO | N   | 171 | 4.105 | 2.612 | 4.363 |
| 13PRO | CD  | 172 | 4.175 | 2.501 | 4.426 |
| 13PRO | HD1 | 173 | 4.285 | 2.502 | 4.407 |
| 13PRO | HD2 | 174 | 4.134 | 2.402 | 4.397 |
| 13PRO | CA  | 175 | 4.012 | 2.675 | 4.453 |
| 13PRO | HA  | 176 | 3.911 | 2.673 | 4.416 |

|       |     |     |       |       |       |
|-------|-----|-----|-------|-------|-------|
| 13PRO | CB  | 177 | 4.010 | 2.597 | 4.584 |
| 13PRO | HB1 | 178 | 4.001 | 2.662 | 4.674 |
| 13PRO | HB2 | 179 | 3.930 | 2.519 | 4.586 |
| 13PRO | CG  | 180 | 4.150 | 2.534 | 4.574 |
| 13PRO | HG1 | 181 | 4.230 | 2.599 | 4.614 |
| 13PRO | HG2 | 182 | 4.154 | 2.447 | 4.642 |
| 13PRO | C   | 183 | 4.040 | 2.820 | 4.471 |
| 13PRO | O   | 184 | 4.157 | 2.854 | 4.487 |
| 14TRP | N   | 185 | 3.939 | 2.909 | 4.464 |
| 14TRP | HN  | 186 | 3.850 | 2.869 | 4.444 |
| 14TRP | CA  | 187 | 3.961 | 3.049 | 4.480 |
| 14TRP | HA  | 188 | 4.051 | 3.065 | 4.539 |
| 14TRP | CB  | 189 | 3.965 | 3.117 | 4.342 |
| 14TRP | HB1 | 190 | 4.018 | 3.045 | 4.275 |
| 14TRP | HB2 | 191 | 3.861 | 3.132 | 4.306 |
| 14TRP | CG  | 192 | 4.041 | 3.245 | 4.337 |
| 14TRP | CD1 | 193 | 3.991 | 3.371 | 4.328 |
| 14TRP | HD1 | 194 | 3.887 | 3.393 | 4.308 |
| 14TRP | NE1 | 195 | 4.085 | 3.466 | 4.357 |
| 14TRP | HE1 | 196 | 4.076 | 3.562 | 4.341 |
| 14TRP | CE2 | 197 | 4.199 | 3.398 | 4.392 |
| 14TRP | CD2 | 198 | 4.177 | 3.262 | 4.378 |
| 14TRP | CE3 | 199 | 4.278 | 3.174 | 4.403 |
| 14TRP | HE3 | 200 | 4.269 | 3.069 | 4.381 |
| 14TRP | CZ3 | 201 | 4.401 | 3.225 | 4.440 |
| 14TRP | HZ3 | 202 | 4.478 | 3.154 | 4.465 |
| 14TRP | CZ2 | 203 | 4.319 | 3.449 | 4.433 |
| 14TRP | HZ2 | 204 | 4.336 | 3.555 | 4.426 |
| 14TRP | CH2 | 205 | 4.420 | 3.360 | 4.460 |
| 14TRP | HH2 | 206 | 4.518 | 3.396 | 4.488 |

|       |     |     |       |       |       |
|-------|-----|-----|-------|-------|-------|
| 14TRP | C   | 207 | 3.850 | 3.111 | 4.557 |
| 14TRP | O   | 208 | 3.737 | 3.062 | 4.565 |
| 15GLU | N   | 209 | 3.873 | 3.232 | 4.611 |
| 15GLU | HN  | 210 | 3.963 | 3.276 | 4.609 |
| 15GLU | CA  | 211 | 3.777 | 3.317 | 4.675 |
| 15GLU | HA  | 212 | 3.704 | 3.254 | 4.724 |
| 15GLU | CB  | 213 | 3.823 | 3.408 | 4.790 |
| 15GLU | HB1 | 214 | 3.917 | 3.454 | 4.753 |
| 15GLU | HB2 | 215 | 3.756 | 3.495 | 4.807 |
| 15GLU | CG  | 216 | 3.837 | 3.330 | 4.921 |
| 15GLU | HG1 | 217 | 3.752 | 3.258 | 4.929 |
| 15GLU | HG2 | 218 | 3.926 | 3.264 | 4.918 |
| 15GLU | CD  | 219 | 3.848 | 3.416 | 5.047 |
| 15GLU | OE1 | 220 | 3.759 | 3.405 | 5.136 |
| 15GLU | OE2 | 221 | 3.949 | 3.491 | 5.054 |
| 15GLU | C   | 222 | 3.700 | 3.406 | 4.584 |
| 15GLU | O   | 223 | 3.758 | 3.493 | 4.519 |
| 16GLY | N   | 224 | 3.568 | 3.387 | 4.568 |
| 16GLY | HN  | 225 | 3.518 | 3.319 | 4.621 |
| 16GLY | CA  | 226 | 3.490 | 3.457 | 4.471 |
| 16GLY | HA1 | 227 | 3.389 | 3.441 | 4.503 |
| 16GLY | HA2 | 228 | 3.518 | 3.562 | 4.468 |
| 16GLY | C   | 229 | 3.485 | 3.406 | 4.332 |
| 16GLY | O   | 230 | 3.554 | 3.311 | 4.293 |
| 17GLY | N   | 231 | 3.410 | 3.469 | 4.240 |
| 17GLY | HN  | 232 | 3.342 | 3.537 | 4.268 |
| 17GLY | CA  | 233 | 3.392 | 3.425 | 4.105 |
| 17GLY | HA1 | 234 | 3.473 | 3.363 | 4.070 |
| 17GLY | HA2 | 235 | 3.294 | 3.380 | 4.105 |
| 17GLY | C   | 236 | 3.386 | 3.540 | 4.010 |

|       |      |     |       |       |       |
|-------|------|-----|-------|-------|-------|
| 17GLY | O    | 237 | 3.389 | 3.655 | 4.052 |
| 18ILE | N    | 238 | 3.361 | 3.518 | 3.880 |
| 18ILE | HN   | 239 | 3.357 | 3.426 | 3.842 |
| 18ILE | CA   | 240 | 3.361 | 3.620 | 3.780 |
| 18ILE | HA   | 241 | 3.327 | 3.714 | 3.823 |
| 18ILE | CB   | 242 | 3.496 | 3.632 | 3.716 |
| 18ILE | HB   | 243 | 3.488 | 3.693 | 3.623 |
| 18ILE | CG2  | 244 | 3.584 | 3.715 | 3.811 |
| 18ILE | HG21 | 245 | 3.538 | 3.810 | 3.846 |
| 18ILE | HG22 | 246 | 3.615 | 3.660 | 3.902 |
| 18ILE | HG23 | 247 | 3.681 | 3.740 | 3.763 |
| 18ILE | CG1  | 248 | 3.557 | 3.495 | 3.684 |
| 18ILE | HG11 | 249 | 3.570 | 3.435 | 3.777 |
| 18ILE | HG12 | 250 | 3.478 | 3.438 | 3.631 |
| 18ILE | CD   | 251 | 3.690 | 3.492 | 3.609 |
| 18ILE | HD1  | 252 | 3.711 | 3.390 | 3.571 |
| 18ILE | HD2  | 253 | 3.684 | 3.564 | 3.525 |
| 18ILE | HD3  | 254 | 3.779 | 3.521 | 3.669 |
| 18ILE | C    | 255 | 3.253 | 3.599 | 3.680 |
| 18ILE | O    | 256 | 3.211 | 3.490 | 3.640 |
| 19ARG | N    | 257 | 3.192 | 3.710 | 3.633 |
| 19ARG | HN   | 258 | 3.219 | 3.799 | 3.670 |
| 19ARG | CA   | 259 | 3.088 | 3.709 | 3.536 |
| 19ARG | HA   | 260 | 3.080 | 3.613 | 3.487 |
| 19ARG | CB   | 261 | 2.948 | 3.734 | 3.594 |
| 19ARG | HB1  | 262 | 2.870 | 3.693 | 3.526 |
| 19ARG | HB2  | 263 | 2.952 | 3.677 | 3.689 |
| 19ARG | CG   | 264 | 2.906 | 3.879 | 3.624 |
| 19ARG | HG1  | 265 | 2.989 | 3.915 | 3.690 |
| 19ARG | HG2  | 266 | 2.909 | 3.945 | 3.535 |

|       |      |     |       |       |       |
|-------|------|-----|-------|-------|-------|
| 19ARG | CD   | 267 | 2.783 | 3.897 | 3.711 |
| 19ARG | HD1  | 268 | 2.810 | 3.832 | 3.797 |
| 19ARG | HD2  | 269 | 2.768 | 4.002 | 3.742 |
| 19ARG | NE   | 270 | 2.663 | 3.853 | 3.633 |
| 19ARG | HE   | 271 | 2.663 | 3.849 | 3.533 |
| 19ARG | CZ   | 272 | 2.534 | 3.846 | 3.676 |
| 19ARG | NH1  | 273 | 2.509 | 3.841 | 3.810 |
| 19ARG | HH11 | 274 | 2.591 | 3.828 | 3.866 |
| 19ARG | HH12 | 275 | 2.423 | 3.801 | 3.842 |
| 19ARG | NH2  | 276 | 2.435 | 3.838 | 3.583 |
| 19ARG | HH21 | 277 | 2.452 | 3.841 | 3.485 |
| 19ARG | HH22 | 278 | 2.340 | 3.834 | 3.614 |
| 19ARG | C    | 279 | 3.132 | 3.817 | 3.443 |
| 19ARG | O    | 280 | 3.159 | 3.932 | 3.479 |
| 20TYR | N    | 281 | 3.132 | 3.789 | 3.312 |
| 20TYR | HN   | 282 | 3.106 | 3.696 | 3.284 |
| 20TYR | CA   | 283 | 3.163 | 3.877 | 3.204 |
| 20TYR | HA   | 284 | 3.265 | 3.909 | 3.222 |
| 20TYR | CB   | 285 | 3.171 | 3.784 | 3.082 |
| 20TYR | HB1  | 286 | 3.242 | 3.700 | 3.096 |
| 20TYR | HB2  | 287 | 3.072 | 3.733 | 3.072 |
| 20TYR | CG   | 288 | 3.196 | 3.849 | 2.950 |
| 20TYR | CD1  | 289 | 3.321 | 3.859 | 2.893 |
| 20TYR | HD1  | 290 | 3.396 | 3.797 | 2.939 |
| 20TYR | CE1  | 291 | 3.339 | 3.936 | 2.781 |
| 20TYR | HE1  | 292 | 3.435 | 3.933 | 2.731 |
| 20TYR | CZ   | 293 | 3.234 | 3.986 | 2.708 |
| 20TYR | OH   | 294 | 3.256 | 4.047 | 2.583 |
| 20TYR | HH   | 295 | 3.171 | 4.072 | 2.546 |
| 20TYR | CD2  | 296 | 3.092 | 3.906 | 2.881 |

|       |      |     |       |       |       |
|-------|------|-----|-------|-------|-------|
| 20TYR | HD2  | 297 | 2.996 | 3.909 | 2.932 |
| 20TYR | CE2  | 298 | 3.110 | 3.981 | 2.767 |
| 20TYR | HE2  | 299 | 3.022 | 4.012 | 2.712 |
| 20TYR | C    | 300 | 3.072 | 3.994 | 3.194 |
| 20TYR | O    | 301 | 2.956 | 3.989 | 3.235 |
| 21ARG | N    | 302 | 3.133 | 4.106 | 3.149 |
| 21ARG | HN   | 303 | 3.228 | 4.118 | 3.122 |
| 21ARG | CA   | 304 | 3.060 | 4.229 | 3.138 |
| 21ARG | HA   | 305 | 2.954 | 4.211 | 3.135 |
| 21ARG | CB   | 306 | 3.077 | 4.339 | 3.243 |
| 21ARG | HB1  | 307 | 3.187 | 4.357 | 3.256 |
| 21ARG | HB2  | 308 | 3.029 | 4.435 | 3.216 |
| 21ARG | CG   | 309 | 3.021 | 4.300 | 3.380 |
| 21ARG | HG1  | 310 | 3.073 | 4.208 | 3.415 |
| 21ARG | HG2  | 311 | 3.038 | 4.376 | 3.458 |
| 21ARG | CD   | 312 | 2.869 | 4.279 | 3.376 |
| 21ARG | HD1  | 313 | 2.814 | 4.367 | 3.336 |
| 21ARG | HD2  | 314 | 2.837 | 4.194 | 3.312 |
| 21ARG | NE   | 315 | 2.829 | 4.250 | 3.516 |
| 21ARG | HE   | 316 | 2.896 | 4.273 | 3.587 |
| 21ARG | CZ   | 317 | 2.706 | 4.210 | 3.560 |
| 21ARG | NH1  | 318 | 2.591 | 4.203 | 3.488 |
| 21ARG | HH11 | 319 | 2.597 | 4.211 | 3.388 |
| 21ARG | HH12 | 320 | 2.509 | 4.167 | 3.533 |
| 21ARG | NH2  | 321 | 2.686 | 4.223 | 3.694 |
| 21ARG | HH21 | 322 | 2.762 | 4.253 | 3.752 |
| 21ARG | HH22 | 323 | 2.595 | 4.197 | 3.726 |
| 21ARG | C    | 324 | 3.091 | 4.294 | 3.007 |
| 21ARG | O    | 325 | 3.209 | 4.300 | 2.972 |
| 22GLY | N    | 326 | 2.991 | 4.347 | 2.935 |



|       |      |     |       |       |       |
|-------|------|-----|-------|-------|-------|
| 22GLY | HN   | 327 | 2.900 | 4.347 | 2.976 |
| 22GLY | CA   | 328 | 2.995 | 4.405 | 2.804 |
| 22GLY | HA1  | 329 | 2.950 | 4.502 | 2.814 |
| 22GLY | HA2  | 330 | 3.098 | 4.411 | 2.775 |
| 22GLY | C    | 331 | 2.935 | 4.313 | 2.704 |
| 22GLY | O    | 332 | 2.868 | 4.213 | 2.732 |
| 23LEU | N    | 333 | 2.968 | 4.338 | 2.576 |
| 23LEU | HN   | 334 | 3.033 | 4.407 | 2.545 |
| 23LEU | CA   | 335 | 2.893 | 4.282 | 2.467 |
| 23LEU | HA   | 336 | 2.794 | 4.316 | 2.488 |
| 23LEU | CB   | 337 | 2.921 | 4.349 | 2.331 |
| 23LEU | HB1  | 338 | 2.845 | 4.324 | 2.254 |
| 23LEU | HB2  | 339 | 2.922 | 4.460 | 2.333 |
| 23LEU | CG   | 340 | 3.061 | 4.321 | 2.274 |
| 23LEU | HG   | 341 | 3.056 | 4.213 | 2.251 |
| 23LEU | CD1  | 342 | 3.067 | 4.396 | 2.140 |
| 23LEU | HD11 | 343 | 3.158 | 4.374 | 2.080 |
| 23LEU | HD12 | 344 | 2.980 | 4.361 | 2.080 |
| 23LEU | HD13 | 345 | 3.066 | 4.506 | 2.152 |
| 23LEU | CD2  | 346 | 3.184 | 4.367 | 2.354 |
| 23LEU | HD21 | 347 | 3.189 | 4.323 | 2.456 |
| 23LEU | HD22 | 348 | 3.281 | 4.346 | 2.302 |
| 23LEU | HD23 | 349 | 3.181 | 4.478 | 2.359 |
| 23LEU | C    | 350 | 2.897 | 4.133 | 2.454 |
| 23LEU | O    | 351 | 3.000 | 4.067 | 2.465 |
| 24THR | N    | 352 | 2.778 | 4.075 | 2.427 |
| 24THR | HN   | 353 | 2.709 | 4.141 | 2.399 |
| 24THR | CA   | 354 | 2.758 | 3.933 | 2.434 |
| 24THR | HA   | 355 | 2.785 | 3.897 | 2.532 |
| 24THR | CB   | 356 | 2.613 | 3.900 | 2.414 |

|       |      |     |       |       |       |
|-------|------|-----|-------|-------|-------|
| 24THR | HB   | 357 | 2.569 | 3.954 | 2.327 |
| 24THR | OG1  | 358 | 2.541 | 3.938 | 2.531 |
| 24THR | HG1  | 359 | 2.520 | 4.032 | 2.534 |
| 24THR | CG2  | 360 | 2.594 | 3.749 | 2.397 |
| 24THR | HG21 | 361 | 2.485 | 3.728 | 2.388 |
| 24THR | HG22 | 362 | 2.639 | 3.716 | 2.301 |
| 24THR | HG23 | 363 | 2.628 | 3.700 | 2.491 |
| 24THR | C    | 364 | 2.850 | 3.856 | 2.346 |
| 24THR | O    | 365 | 2.838 | 3.840 | 2.225 |
| 25ARG | N    | 366 | 2.948 | 3.792 | 2.412 |
| 25ARG | HN   | 367 | 2.968 | 3.806 | 2.509 |
| 25ARG | CA   | 368 | 3.040 | 3.701 | 2.351 |
| 25ARG | HA   | 369 | 2.998 | 3.655 | 2.263 |
| 25ARG | CB   | 370 | 3.176 | 3.765 | 2.320 |
| 25ARG | HB1  | 371 | 3.225 | 3.812 | 2.408 |
| 25ARG | HB2  | 372 | 3.246 | 3.685 | 2.287 |
| 25ARG | CG   | 373 | 3.167 | 3.879 | 2.219 |
| 25ARG | HG1  | 374 | 3.093 | 3.954 | 2.254 |
| 25ARG | HG2  | 375 | 3.261 | 3.934 | 2.198 |
| 25ARG | CD   | 376 | 3.126 | 3.831 | 2.079 |
| 25ARG | HD1  | 377 | 3.216 | 3.777 | 2.043 |
| 25ARG | HD2  | 378 | 3.030 | 3.775 | 2.082 |
| 25ARG | NE   | 379 | 3.128 | 3.949 | 1.989 |
| 25ARG | HE   | 380 | 3.214 | 3.969 | 1.941 |
| 25ARG | CZ   | 381 | 3.018 | 4.019 | 1.947 |
| 25ARG | NH1  | 382 | 2.895 | 4.000 | 2.002 |
| 25ARG | HH11 | 383 | 2.887 | 3.944 | 2.085 |
| 25ARG | HH12 | 384 | 2.826 | 4.067 | 1.977 |
| 25ARG | NH2  | 385 | 3.042 | 4.112 | 1.850 |
| 25ARG | HH21 | 386 | 3.127 | 4.102 | 1.798 |

|       |      |     |       |       |       |
|-------|------|-----|-------|-------|-------|
| 25ARG | HH22 | 387 | 2.971 | 4.177 | 1.823 |
| 25ARG | C    | 388 | 3.062 | 3.593 | 2.452 |
| 25ARG | O    | 389 | 3.098 | 3.619 | 2.567 |
| 26ASP | N    | 390 | 3.051 | 3.467 | 2.407 |
| 26ASP | HN   | 391 | 3.031 | 3.437 | 2.314 |
| 26ASP | CA   | 392 | 3.079 | 3.362 | 2.500 |
| 26ASP | HA   | 393 | 3.060 | 3.393 | 2.602 |
| 26ASP | CB   | 394 | 2.991 | 3.240 | 2.472 |
| 26ASP | HB1  | 395 | 2.891 | 3.279 | 2.444 |
| 26ASP | HB2  | 396 | 3.021 | 3.177 | 2.385 |
| 26ASP | CG   | 397 | 2.968 | 3.149 | 2.592 |
| 26ASP | OD1  | 398 | 2.916 | 3.037 | 2.566 |
| 26ASP | OD2  | 399 | 2.974 | 3.201 | 2.707 |
| 26ASP | C    | 400 | 3.218 | 3.308 | 2.505 |
| 26ASP | O    | 401 | 3.273 | 3.262 | 2.406 |
| 27GLN | N    | 402 | 3.284 | 3.316 | 2.622 |
| 27GLN | HN   | 403 | 3.230 | 3.325 | 2.705 |
| 27GLN | CA   | 404 | 3.421 | 3.296 | 2.659 |
| 27GLN | HA   | 405 | 3.477 | 3.334 | 2.574 |
| 27GLN | CB   | 406 | 3.450 | 3.366 | 2.792 |
| 27GLN | HB1  | 407 | 3.397 | 3.314 | 2.874 |
| 27GLN | HB2  | 408 | 3.557 | 3.357 | 2.821 |
| 27GLN | CG   | 409 | 3.423 | 3.517 | 2.790 |
| 27GLN | HG1  | 410 | 3.312 | 3.524 | 2.794 |
| 27GLN | HG2  | 411 | 3.465 | 3.565 | 2.881 |
| 27GLN | CD   | 412 | 3.479 | 3.584 | 2.665 |
| 27GLN | OE1  | 413 | 3.600 | 3.579 | 2.646 |
| 27GLN | NE2  | 414 | 3.398 | 3.659 | 2.585 |
| 27GLN | HE21 | 415 | 3.301 | 3.663 | 2.609 |
| 27GLN | HE22 | 416 | 3.441 | 3.736 | 2.538 |

|       |      |     |       |       |       |
|-------|------|-----|-------|-------|-------|
| 27GLN | C    | 417 | 3.462 | 3.153 | 2.661 |
| 27GLN | O    | 418 | 3.398 | 3.064 | 2.716 |
| 28VAL | N    | 419 | 3.584 | 3.128 | 2.608 |
| 28VAL | HN   | 420 | 3.634 | 3.203 | 2.566 |
| 28VAL | CA   | 421 | 3.640 | 2.997 | 2.607 |
| 28VAL | HA   | 422 | 3.559 | 2.935 | 2.573 |
| 28VAL | CB   | 423 | 3.747 | 2.998 | 2.502 |
| 28VAL | HB   | 424 | 3.830 | 3.062 | 2.539 |
| 28VAL | CG1  | 425 | 3.812 | 2.860 | 2.483 |
| 28VAL | HG11 | 426 | 3.882 | 2.867 | 2.397 |
| 28VAL | HG12 | 427 | 3.880 | 2.823 | 2.563 |
| 28VAL | HG13 | 428 | 3.736 | 2.783 | 2.461 |
| 28VAL | CG2  | 429 | 3.697 | 3.044 | 2.364 |
| 28VAL | HG21 | 430 | 3.659 | 3.148 | 2.352 |
| 28VAL | HG22 | 431 | 3.789 | 3.033 | 2.303 |
| 28VAL | HG23 | 432 | 3.616 | 2.982 | 2.320 |
| 28VAL | C    | 433 | 3.686 | 2.954 | 2.742 |
| 28VAL | O    | 434 | 3.775 | 3.012 | 2.805 |
| 29LYS | N    | 435 | 3.639 | 2.837 | 2.788 |
| 29LYS | HN   | 436 | 3.576 | 2.788 | 2.728 |
| 29LYS | CA   | 437 | 3.656 | 2.784 | 2.919 |
| 29LYS | HA   | 438 | 3.674 | 2.860 | 2.994 |
| 29LYS | CB   | 439 | 3.530 | 2.700 | 2.946 |
| 29LYS | HB1  | 440 | 3.537 | 2.624 | 2.865 |
| 29LYS | HB2  | 441 | 3.534 | 2.643 | 3.041 |
| 29LYS | CG   | 442 | 3.398 | 2.778 | 2.949 |
| 29LYS | HG1  | 443 | 3.384 | 2.829 | 2.851 |
| 29LYS | HG2  | 444 | 3.317 | 2.704 | 2.963 |
| 29LYS | CD   | 445 | 3.395 | 2.864 | 3.076 |
| 29LYS | HD1  | 446 | 3.423 | 2.804 | 3.165 |

|       |      |     |       |       |       |
|-------|------|-----|-------|-------|-------|
| 29LYS | HD2  | 447 | 3.472 | 2.942 | 3.058 |
| 29LYS | CE   | 448 | 3.263 | 2.938 | 3.089 |
| 29LYS | HE1  | 449 | 3.263 | 3.013 | 3.172 |
| 29LYS | HE2  | 450 | 3.233 | 2.980 | 2.990 |
| 29LYS | NZ   | 451 | 3.162 | 2.834 | 3.120 |
| 29LYS | HZ1  | 452 | 3.206 | 2.742 | 3.102 |
| 29LYS | HZ2  | 453 | 3.138 | 2.833 | 3.221 |
| 29LYS | HZ3  | 454 | 3.085 | 2.844 | 3.050 |
| 29LYS | C    | 455 | 3.783 | 2.705 | 2.925 |
| 29LYS | O    | 456 | 3.816 | 2.656 | 3.033 |
| 30ALA | N    | 457 | 3.853 | 2.690 | 2.812 |
| 30ALA | HN   | 458 | 3.814 | 2.735 | 2.731 |
| 30ALA | CA   | 459 | 3.959 | 2.597 | 2.790 |
| 30ALA | HA   | 460 | 3.955 | 2.524 | 2.870 |
| 30ALA | CB   | 461 | 3.930 | 2.530 | 2.654 |
| 30ALA | HB1  | 462 | 4.002 | 2.448 | 2.632 |
| 30ALA | HB2  | 463 | 3.825 | 2.494 | 2.657 |
| 30ALA | HB3  | 464 | 3.941 | 2.600 | 2.569 |
| 30ALA | C    | 465 | 4.090 | 2.667 | 2.793 |
| 30ALA | O    | 466 | 4.193 | 2.600 | 2.793 |
| 31ILE | N    | 467 | 4.094 | 2.800 | 2.813 |
| 31ILE | HN   | 468 | 4.007 | 2.847 | 2.830 |
| 31ILE | CA   | 469 | 4.207 | 2.887 | 2.816 |
| 31ILE | HA   | 470 | 4.295 | 2.824 | 2.818 |
| 31ILE | CB   | 471 | 4.202 | 2.994 | 2.711 |
| 31ILE | HB   | 472 | 4.280 | 3.068 | 2.740 |
| 31ILE | CG2  | 473 | 4.232 | 2.928 | 2.576 |
| 31ILE | HG21 | 474 | 4.141 | 2.881 | 2.532 |
| 31ILE | HG22 | 475 | 4.269 | 3.004 | 2.504 |
| 31ILE | HG23 | 476 | 4.315 | 2.856 | 2.591 |

|       |      |     |       |       |       |
|-------|------|-----|-------|-------|-------|
| 31ILE | CG1  | 477 | 4.077 | 3.084 | 2.717 |
| 31ILE | HG11 | 478 | 3.994 | 3.021 | 2.678 |
| 31ILE | HG12 | 479 | 4.062 | 3.133 | 2.816 |
| 31ILE | CD   | 480 | 4.084 | 3.199 | 2.617 |
| 31ILE | HD1  | 481 | 4.172 | 3.258 | 2.650 |
| 31ILE | HD2  | 482 | 4.078 | 3.173 | 2.509 |
| 31ILE | HD3  | 483 | 4.001 | 3.271 | 2.634 |
| 31ILE | C    | 484 | 4.214 | 2.951 | 2.950 |
| 31ILE | O    | 485 | 4.113 | 2.973 | 3.018 |
| 32ASN | N    | 486 | 4.337 | 2.984 | 2.992 |
| 32ASN | HN   | 487 | 4.416 | 2.976 | 2.931 |
| 32ASN | CA   | 488 | 4.363 | 3.043 | 3.120 |
| 32ASN | HA   | 489 | 4.300 | 3.001 | 3.197 |
| 32ASN | CB   | 490 | 4.497 | 2.992 | 3.176 |
| 32ASN | HB1  | 491 | 4.586 | 3.031 | 3.122 |
| 32ASN | HB2  | 492 | 4.516 | 3.030 | 3.279 |
| 32ASN | CG   | 493 | 4.521 | 2.842 | 3.169 |
| 32ASN | OD1  | 494 | 4.624 | 2.801 | 3.117 |
| 32ASN | ND2  | 495 | 4.417 | 2.763 | 3.206 |
| 32ASN | HD21 | 496 | 4.329 | 2.807 | 3.226 |
| 32ASN | HD22 | 497 | 4.421 | 2.664 | 3.196 |
| 32ASN | C    | 498 | 4.357 | 3.191 | 3.118 |
| 32ASN | O    | 499 | 4.424 | 3.255 | 3.198 |
| 33PHE | N    | 500 | 4.291 | 3.244 | 3.013 |
| 33PHE | HN   | 501 | 4.252 | 3.183 | 2.944 |
| 33PHE | CA   | 502 | 4.299 | 3.385 | 2.992 |
| 33PHE | HA   | 503 | 4.299 | 3.441 | 3.084 |
| 33PHE | CB   | 504 | 4.425 | 3.421 | 2.911 |
| 33PHE | HB1  | 505 | 4.438 | 3.530 | 2.901 |
| 33PHE | HB2  | 506 | 4.507 | 3.379 | 2.973 |

|       |      |     |       |       |       |
|-------|------|-----|-------|-------|-------|
| 33PHE | CG   | 507 | 4.436 | 3.360 | 2.775 |
| 33PHE | CD1  | 508 | 4.517 | 3.251 | 2.754 |
| 33PHE | HD1  | 509 | 4.577 | 3.221 | 2.839 |
| 33PHE | CE1  | 510 | 4.556 | 3.210 | 2.629 |
| 33PHE | HE1  | 511 | 4.629 | 3.132 | 2.612 |
| 33PHE | CZ   | 512 | 4.490 | 3.267 | 2.523 |
| 33PHE | HZ   | 513 | 4.514 | 3.234 | 2.423 |
| 33PHE | CD2  | 514 | 4.370 | 3.408 | 2.664 |
| 33PHE | HD2  | 515 | 4.313 | 3.497 | 2.685 |
| 33PHE | CE2  | 516 | 4.394 | 3.365 | 2.535 |
| 33PHE | HE2  | 517 | 4.335 | 3.413 | 2.459 |
| 33PHE | C    | 518 | 4.170 | 3.434 | 2.935 |
| 33PHE | O    | 519 | 4.074 | 3.362 | 2.907 |
| 34LEU | N    | 520 | 4.163 | 3.568 | 2.929 |
| 34LEU | HN   | 521 | 4.236 | 3.623 | 2.969 |
| 34LEU | CA   | 522 | 4.051 | 3.648 | 2.890 |
| 34LEU | HA   | 523 | 3.973 | 3.580 | 2.860 |
| 34LEU | CB   | 524 | 3.995 | 3.729 | 3.008 |
| 34LEU | HB1  | 525 | 3.978 | 3.669 | 3.101 |
| 34LEU | HB2  | 526 | 4.083 | 3.789 | 3.039 |
| 34LEU | CG   | 527 | 3.864 | 3.800 | 2.971 |
| 34LEU | HG   | 528 | 3.875 | 3.846 | 2.870 |
| 34LEU | CD1  | 529 | 3.745 | 3.702 | 2.974 |
| 34LEU | HD11 | 530 | 3.746 | 3.637 | 2.884 |
| 34LEU | HD12 | 531 | 3.738 | 3.637 | 3.064 |
| 34LEU | HD13 | 532 | 3.653 | 3.764 | 2.965 |
| 34LEU | CD2  | 533 | 3.845 | 3.921 | 3.063 |
| 34LEU | HD21 | 534 | 3.852 | 3.904 | 3.173 |
| 34LEU | HD22 | 535 | 3.906 | 4.004 | 3.021 |
| 34LEU | HD23 | 536 | 3.744 | 3.962 | 3.041 |

|       |      |     |       |       |       |
|-------|------|-----|-------|-------|-------|
| 34LEU | C    | 537 | 4.107 | 3.728 | 2.778 |
| 34LEU | O    | 538 | 4.210 | 3.789 | 2.808 |
| 35PRO | N    | 539 | 4.047 | 3.732 | 2.663 |
| 35PRO | CD   | 540 | 3.973 | 3.621 | 2.604 |
| 35PRO | HD1  | 541 | 3.869 | 3.638 | 2.639 |
| 35PRO | HD2  | 542 | 4.016 | 3.530 | 2.651 |
| 35PRO | CA   | 543 | 4.086 | 3.820 | 2.557 |
| 35PRO | HA   | 544 | 4.185 | 3.789 | 2.527 |
| 35PRO | CB   | 545 | 4.000 | 3.783 | 2.435 |
| 35PRO | HB1  | 546 | 3.900 | 3.831 | 2.443 |
| 35PRO | HB2  | 547 | 4.037 | 3.828 | 2.341 |
| 35PRO | CG   | 548 | 3.992 | 3.631 | 2.451 |
| 35PRO | HG1  | 549 | 3.914 | 3.585 | 2.387 |
| 35PRO | HG2  | 550 | 4.088 | 3.585 | 2.419 |
| 35PRO | C    | 551 | 4.103 | 3.966 | 2.582 |
| 35PRO | O    | 552 | 4.028 | 4.010 | 2.670 |
| 36VAL | N    | 553 | 4.189 | 4.041 | 2.512 |
| 36VAL | HN   | 554 | 4.255 | 3.994 | 2.454 |
| 36VAL | CA   | 555 | 4.199 | 4.184 | 2.504 |
| 36VAL | HA   | 556 | 4.234 | 4.203 | 2.604 |
| 36VAL | CB   | 557 | 4.296 | 4.229 | 2.400 |
| 36VAL | HB   | 558 | 4.268 | 4.183 | 2.303 |
| 36VAL | CG1  | 559 | 4.304 | 4.380 | 2.371 |
| 36VAL | HG11 | 560 | 4.211 | 4.413 | 2.321 |
| 36VAL | HG12 | 561 | 4.312 | 4.444 | 2.461 |
| 36VAL | HG13 | 562 | 4.388 | 4.395 | 2.298 |
| 36VAL | CG2  | 563 | 4.431 | 4.192 | 2.463 |
| 36VAL | HG21 | 564 | 4.464 | 4.086 | 2.470 |
| 36VAL | HG22 | 565 | 4.507 | 4.239 | 2.397 |
| 36VAL | HG23 | 566 | 4.444 | 4.240 | 2.563 |



|       |     |     |       |       |       |
|-------|-----|-----|-------|-------|-------|
| 36VAL | C   | 567 | 4.073 | 4.262 | 2.492 |
| 36VAL | O   | 568 | 3.974 | 4.226 | 2.429 |
| 37ASP | N   | 569 | 4.066 | 4.377 | 2.562 |
| 37ASP | HN  | 570 | 4.146 | 4.408 | 2.612 |
| 37ASP | CA  | 571 | 3.954 | 4.465 | 2.577 |
| 37ASP | HA  | 572 | 3.986 | 4.551 | 2.635 |
| 37ASP | CB  | 573 | 3.910 | 4.537 | 2.449 |
| 37ASP | HB1 | 574 | 3.901 | 4.461 | 2.369 |
| 37ASP | HB2 | 575 | 3.814 | 4.591 | 2.464 |
| 37ASP | CG  | 576 | 4.009 | 4.642 | 2.400 |
| 37ASP | OD1 | 577 | 4.110 | 4.675 | 2.469 |
| 37ASP | OD2 | 578 | 3.990 | 4.709 | 2.296 |
| 37ASP | C   | 579 | 3.834 | 4.410 | 2.646 |
| 37ASP | O   | 580 | 3.745 | 4.484 | 2.687 |
| 38TYR | N   | 581 | 3.818 | 4.278 | 2.663 |
| 38TYR | HN  | 582 | 3.872 | 4.222 | 2.599 |
| 38TYR | CA  | 583 | 3.713 | 4.225 | 2.743 |
| 38TYR | HA  | 584 | 3.622 | 4.279 | 2.722 |
| 38TYR | CB  | 585 | 3.689 | 4.073 | 2.731 |
| 38TYR | HB1 | 586 | 3.785 | 4.030 | 2.766 |
| 38TYR | HB2 | 587 | 3.608 | 4.033 | 2.797 |
| 38TYR | CG  | 588 | 3.655 | 4.036 | 2.591 |
| 38TYR | CD1 | 589 | 3.571 | 4.108 | 2.510 |
| 38TYR | HD1 | 590 | 3.551 | 4.211 | 2.537 |
| 38TYR | CE1 | 591 | 3.521 | 4.058 | 2.392 |
| 38TYR | HE1 | 592 | 3.466 | 4.114 | 2.318 |
| 38TYR | CZ  | 593 | 3.568 | 3.935 | 2.352 |
| 38TYR | OH  | 594 | 3.528 | 3.888 | 2.225 |
| 38TYR | HH  | 595 | 3.467 | 3.958 | 2.200 |
| 38TYR | CD2 | 596 | 3.677 | 3.904 | 2.558 |

|       |      |     |       |       |       |
|-------|------|-----|-------|-------|-------|
| 38TYR | HD2  | 597 | 3.735 | 3.838 | 2.621 |
| 38TYR | CE2  | 598 | 3.638 | 3.853 | 2.437 |
| 38TYR | HE2  | 599 | 3.652 | 3.748 | 2.413 |
| 38TYR | C    | 600 | 3.728 | 4.256 | 2.888 |
| 38TYR | O    | 601 | 3.839 | 4.270 | 2.940 |
| 39GLU | N    | 602 | 3.614 | 4.269 | 2.959 |
| 39GLU | HN   | 603 | 3.525 | 4.250 | 2.918 |
| 39GLU | CA   | 604 | 3.595 | 4.294 | 3.098 |
| 39GLU | HA   | 605 | 3.691 | 4.299 | 3.148 |
| 39GLU | CB   | 606 | 3.505 | 4.417 | 3.120 |
| 39GLU | HB1  | 607 | 3.413 | 4.395 | 3.062 |
| 39GLU | HB2  | 608 | 3.474 | 4.426 | 3.226 |
| 39GLU | CG   | 609 | 3.578 | 4.541 | 3.070 |
| 39GLU | HG1  | 610 | 3.670 | 4.565 | 3.128 |
| 39GLU | HG2  | 611 | 3.608 | 4.527 | 2.963 |
| 39GLU | CD   | 612 | 3.492 | 4.666 | 3.065 |
| 39GLU | OE1  | 613 | 3.462 | 4.722 | 2.956 |
| 39GLU | OE2  | 614 | 3.460 | 4.720 | 3.174 |
| 39GLU | C    | 615 | 3.519 | 4.186 | 3.167 |
| 39GLU | O    | 616 | 3.440 | 4.107 | 3.114 |
| 40ILE | N    | 617 | 3.553 | 4.167 | 3.296 |
| 40ILE | HN   | 618 | 3.629 | 4.216 | 3.338 |
| 40ILE | CA   | 619 | 3.498 | 4.073 | 3.389 |
| 40ILE | HA   | 620 | 3.396 | 4.051 | 3.362 |
| 40ILE | CB   | 621 | 3.570 | 3.943 | 3.408 |
| 40ILE | HB   | 622 | 3.534 | 3.901 | 3.504 |
| 40ILE | CG2  | 623 | 3.541 | 3.845 | 3.293 |
| 40ILE | HG21 | 624 | 3.574 | 3.901 | 3.203 |
| 40ILE | HG22 | 625 | 3.608 | 3.758 | 3.311 |
| 40ILE | HG23 | 626 | 3.434 | 3.815 | 3.290 |

|       |      |     |       |       |       |
|-------|------|-----|-------|-------|-------|
| 40ILE | CG1  | 627 | 3.723 | 3.960 | 3.422 |
| 40ILE | HG11 | 628 | 3.771 | 3.999 | 3.330 |
| 40ILE | HG12 | 629 | 3.746 | 4.039 | 3.496 |
| 40ILE | CD   | 630 | 3.793 | 3.839 | 3.482 |
| 40ILE | HD1  | 631 | 3.754 | 3.808 | 3.582 |
| 40ILE | HD2  | 632 | 3.785 | 3.751 | 3.414 |
| 40ILE | HD3  | 633 | 3.901 | 3.865 | 3.496 |
| 40ILE | C    | 634 | 3.482 | 4.136 | 3.523 |
| 40ILE | O    | 635 | 3.571 | 4.193 | 3.585 |
| 41GLU | N    | 636 | 3.364 | 4.124 | 3.587 |
| 41GLU | HN   | 637 | 3.291 | 4.078 | 3.538 |
| 41GLU | CA   | 638 | 3.338 | 4.177 | 3.717 |
| 41GLU | HA   | 639 | 3.401 | 4.265 | 3.730 |
| 41GLU | CB   | 640 | 3.191 | 4.223 | 3.715 |
| 41GLU | HB1  | 641 | 3.181 | 4.301 | 3.637 |
| 41GLU | HB2  | 642 | 3.137 | 4.131 | 3.684 |
| 41GLU | CG   | 643 | 3.153 | 4.290 | 3.847 |
| 41GLU | HG1  | 644 | 3.202 | 4.239 | 3.932 |
| 41GLU | HG2  | 645 | 3.189 | 4.392 | 3.821 |
| 41GLU | CD   | 646 | 3.002 | 4.300 | 3.863 |
| 41GLU | OE1  | 647 | 2.934 | 4.326 | 3.760 |
| 41GLU | OE2  | 648 | 2.949 | 4.286 | 3.977 |
| 41GLU | C    | 649 | 3.365 | 4.072 | 3.819 |
| 41GLU | O    | 650 | 3.323 | 3.958 | 3.806 |
| 42TYR | N    | 651 | 3.435 | 4.102 | 3.931 |
| 42TYR | HN   | 652 | 3.473 | 4.192 | 3.946 |
| 42TYR | CA   | 653 | 3.459 | 4.010 | 4.038 |
| 42TYR | HA   | 654 | 3.469 | 3.909 | 4.003 |
| 42TYR | CB   | 655 | 3.592 | 4.051 | 4.104 |
| 42TYR | HB1  | 656 | 3.673 | 4.050 | 4.029 |

|       |      |     |       |       |       |
|-------|------|-----|-------|-------|-------|
| 42TYR | HB2  | 657 | 3.578 | 4.159 | 4.131 |
| 42TYR | CG   | 658 | 3.628 | 3.984 | 4.232 |
| 42TYR | CD1  | 659 | 3.642 | 3.847 | 4.231 |
| 42TYR | HD1  | 660 | 3.633 | 3.796 | 4.136 |
| 42TYR | CE1  | 661 | 3.668 | 3.771 | 4.342 |
| 42TYR | HE1  | 662 | 3.686 | 3.665 | 4.331 |
| 42TYR | CZ   | 663 | 3.701 | 3.840 | 4.457 |
| 42TYR | OH   | 664 | 3.743 | 3.769 | 4.571 |
| 42TYR | HH   | 665 | 3.767 | 3.680 | 4.546 |
| 42TYR | CD2  | 666 | 3.663 | 4.045 | 4.350 |
| 42TYR | HD2  | 667 | 3.661 | 4.153 | 4.362 |
| 42TYR | CE2  | 668 | 3.699 | 3.977 | 4.464 |
| 42TYR | HE2  | 669 | 3.743 | 4.033 | 4.545 |
| 42TYR | C    | 670 | 3.347 | 4.014 | 4.137 |
| 42TYR | O    | 671 | 3.298 | 4.120 | 4.175 |
| 43VAL | N    | 672 | 3.304 | 3.893 | 4.176 |
| 43VAL | HN   | 673 | 3.345 | 3.811 | 4.137 |
| 43VAL | CA   | 674 | 3.185 | 3.870 | 4.251 |
| 43VAL | HA   | 675 | 3.151 | 3.966 | 4.287 |
| 43VAL | CB   | 676 | 3.066 | 3.814 | 4.177 |
| 43VAL | HB   | 677 | 3.085 | 3.709 | 4.148 |
| 43VAL | CG1  | 678 | 2.943 | 3.807 | 4.269 |
| 43VAL | HG11 | 679 | 2.906 | 3.905 | 4.307 |
| 43VAL | HG12 | 680 | 2.855 | 3.757 | 4.222 |
| 43VAL | HG13 | 681 | 2.960 | 3.749 | 4.363 |
| 43VAL | CG2  | 682 | 3.044 | 3.896 | 4.049 |
| 43VAL | HG21 | 683 | 2.954 | 3.862 | 3.996 |
| 43VAL | HG22 | 684 | 3.034 | 4.006 | 4.062 |
| 43VAL | HG23 | 685 | 3.129 | 3.884 | 3.978 |
| 43VAL | C    | 686 | 3.220 | 3.787 | 4.370 |

|       |      |     |       |       |       |
|-------|------|-----|-------|-------|-------|
| 43VAL | O    | 687 | 3.235 | 3.666 | 4.352 |
| 44CYS | N    | 688 | 3.222 | 3.846 | 4.491 |
| 44CYS | HN   | 689 | 3.202 | 3.943 | 4.500 |
| 44CYS | CA   | 690 | 3.226 | 3.768 | 4.610 |
| 44CYS | HA   | 691 | 3.298 | 3.688 | 4.600 |
| 44CYS | CB   | 692 | 3.281 | 3.860 | 4.721 |
| 44CYS | HB1  | 693 | 3.377 | 3.901 | 4.684 |
| 44CYS | HB2  | 694 | 3.205 | 3.935 | 4.752 |
| 44CYS | SG   | 695 | 3.330 | 3.775 | 4.874 |
| 44CYS | C    | 696 | 3.100 | 3.694 | 4.640 |
| 44CYS | O    | 697 | 2.990 | 3.729 | 4.599 |
| 45ARG | N    | 698 | 3.109 | 3.577 | 4.706 |
| 45ARG | HN   | 699 | 3.198 | 3.553 | 4.743 |
| 45ARG | CA   | 700 | 3.012 | 3.477 | 4.738 |
| 45ARG | HA   | 701 | 2.958 | 3.455 | 4.647 |
| 45ARG | CB   | 702 | 3.072 | 3.346 | 4.790 |
| 45ARG | HB1  | 703 | 3.118 | 3.373 | 4.887 |
| 45ARG | HB2  | 704 | 2.994 | 3.274 | 4.824 |
| 45ARG | CG   | 705 | 3.163 | 3.280 | 4.687 |
| 45ARG | HG1  | 706 | 3.257 | 3.338 | 4.676 |
| 45ARG | HG2  | 707 | 3.192 | 3.181 | 4.728 |
| 45ARG | CD   | 708 | 3.088 | 3.260 | 4.555 |
| 45ARG | HD1  | 709 | 3.007 | 3.185 | 4.562 |
| 45ARG | HD2  | 710 | 3.058 | 3.359 | 4.513 |
| 45ARG | NE   | 711 | 3.196 | 3.210 | 4.466 |
| 45ARG | HE   | 712 | 3.273 | 3.168 | 4.514 |
| 45ARG | CZ   | 713 | 3.187 | 3.190 | 4.331 |
| 45ARG | NH1  | 714 | 3.079 | 3.228 | 4.257 |
| 45ARG | HH11 | 715 | 3.004 | 3.281 | 4.296 |
| 45ARG | HH12 | 716 | 3.072 | 3.193 | 4.163 |

|       |      |     |       |       |       |
|-------|------|-----|-------|-------|-------|
| 45ARG | NH2  | 717 | 3.284 | 3.116 | 4.270 |
| 45ARG | HH21 | 718 | 3.344 | 3.073 | 4.338 |
| 45ARG | HH22 | 719 | 3.258 | 3.065 | 4.189 |
| 45ARG | C    | 720 | 2.913 | 3.523 | 4.840 |
| 45ARG | O    | 721 | 2.939 | 3.607 | 4.926 |
| 46GLY | N    | 722 | 2.792 | 3.466 | 4.844 |
| 46GLY | HN   | 723 | 2.765 | 3.381 | 4.798 |
| 46GLY | CA   | 724 | 2.683 | 3.521 | 4.918 |
| 46GLY | HA1  | 725 | 2.595 | 3.466 | 4.888 |
| 46GLY | HA2  | 726 | 2.707 | 3.512 | 5.023 |
| 46GLY | C    | 727 | 2.641 | 3.663 | 4.904 |
| 46GLY | O    | 728 | 2.623 | 3.720 | 4.796 |
| 47GLU | N    | 729 | 2.613 | 3.723 | 5.020 |
| 47GLU | HN   | 730 | 2.605 | 3.678 | 5.109 |
| 47GLU | CA   | 731 | 2.564 | 3.858 | 5.027 |
| 47GLU | HA   | 732 | 2.515 | 3.891 | 4.937 |
| 47GLU | CB   | 733 | 2.461 | 3.855 | 5.141 |
| 47GLU | HB1  | 734 | 2.518 | 3.840 | 5.234 |
| 47GLU | HB2  | 735 | 2.422 | 3.959 | 5.141 |
| 47GLU | CG   | 736 | 2.337 | 3.766 | 5.123 |
| 47GLU | HG1  | 737 | 2.307 | 3.770 | 5.016 |
| 47GLU | HG2  | 738 | 2.363 | 3.663 | 5.155 |
| 47GLU | CD   | 739 | 2.216 | 3.818 | 5.198 |
| 47GLU | OE1  | 740 | 2.104 | 3.772 | 5.161 |
| 47GLU | OE2  | 741 | 2.209 | 3.904 | 5.291 |
| 47GLU | C    | 742 | 2.672 | 3.958 | 5.054 |
| 47GLU | O    | 743 | 2.658 | 4.080 | 5.050 |
| 48ARG | N    | 744 | 2.794 | 3.914 | 5.087 |
| 48ARG | HN   | 745 | 2.814 | 3.816 | 5.083 |
| 48ARG | CA   | 746 | 2.912 | 3.995 | 5.104 |

|       |      |     |       |       |       |
|-------|------|-----|-------|-------|-------|
| 48ARG | HA   | 747 | 2.878 | 4.078 | 5.164 |
| 48ARG | CB   | 748 | 3.038 | 3.920 | 5.151 |
| 48ARG | HB1  | 749 | 3.052 | 3.825 | 5.097 |
| 48ARG | HB2  | 750 | 3.126 | 3.987 | 5.144 |
| 48ARG | CG   | 751 | 3.029 | 3.882 | 5.299 |
| 48ARG | HG1  | 752 | 3.009 | 3.972 | 5.360 |
| 48ARG | HG2  | 753 | 2.939 | 3.816 | 5.304 |
| 48ARG | CD   | 754 | 3.152 | 3.820 | 5.365 |
| 48ARG | HD1  | 755 | 3.234 | 3.894 | 5.355 |
| 48ARG | HD2  | 756 | 3.136 | 3.796 | 5.473 |
| 48ARG | NE   | 757 | 3.173 | 3.695 | 5.286 |
| 48ARG | HE   | 758 | 3.093 | 3.652 | 5.245 |
| 48ARG | CZ   | 759 | 3.287 | 3.649 | 5.226 |
| 48ARG | NH1  | 760 | 3.404 | 3.719 | 5.243 |
| 48ARG | HH11 | 761 | 3.424 | 3.811 | 5.275 |
| 48ARG | HH12 | 762 | 3.487 | 3.678 | 5.205 |
| 48ARG | NH2  | 763 | 3.293 | 3.539 | 5.146 |
| 48ARG | HH21 | 764 | 3.220 | 3.473 | 5.162 |
| 48ARG | HH22 | 765 | 3.382 | 3.498 | 5.128 |
| 48ARG | C    | 766 | 2.952 | 4.064 | 4.978 |
| 48ARG | O    | 767 | 2.944 | 4.001 | 4.873 |
| 49GLU | N    | 768 | 3.000 | 4.189 | 4.975 |
| 49GLU | HN   | 769 | 2.984 | 4.241 | 5.059 |
| 49GLU | CA   | 770 | 3.039 | 4.258 | 4.855 |
| 49GLU | HA   | 771 | 2.998 | 4.206 | 4.770 |
| 49GLU | CB   | 772 | 2.972 | 4.396 | 4.853 |
| 49GLU | HB1  | 773 | 2.984 | 4.442 | 4.954 |
| 49GLU | HB2  | 774 | 3.025 | 4.462 | 4.780 |
| 49GLU | CG   | 775 | 2.821 | 4.388 | 4.832 |
| 49GLU | HG1  | 776 | 2.788 | 4.383 | 4.725 |

|       |      |     |       |       |       |
|-------|------|-----|-------|-------|-------|
| 49GLU | HG2  | 777 | 2.764 | 4.302 | 4.873 |
| 49GLU | CD   | 778 | 2.755 | 4.505 | 4.904 |
| 49GLU | OE1  | 779 | 2.699 | 4.594 | 4.835 |
| 49GLU | OE2  | 780 | 2.760 | 4.510 | 5.030 |
| 49GLU | C    | 781 | 3.187 | 4.271 | 4.849 |
| 49GLU | O    | 782 | 3.262 | 4.260 | 4.946 |
| 50VAL | N    | 783 | 3.235 | 4.304 | 4.728 |
| 50VAL | HN   | 784 | 3.175 | 4.315 | 4.651 |
| 50VAL | CA   | 785 | 3.373 | 4.324 | 4.695 |
| 50VAL | HA   | 786 | 3.436 | 4.251 | 4.747 |
| 50VAL | CB   | 787 | 3.392 | 4.309 | 4.547 |
| 50VAL | HB   | 788 | 3.316 | 4.369 | 4.493 |
| 50VAL | CG1  | 789 | 3.531 | 4.351 | 4.496 |
| 50VAL | HG11 | 790 | 3.558 | 4.452 | 4.534 |
| 50VAL | HG12 | 791 | 3.612 | 4.288 | 4.537 |
| 50VAL | HG13 | 792 | 3.523 | 4.359 | 4.385 |
| 50VAL | CG2  | 793 | 3.378 | 4.163 | 4.504 |
| 50VAL | HG21 | 794 | 3.276 | 4.118 | 4.512 |
| 50VAL | HG22 | 795 | 3.404 | 4.147 | 4.397 |
| 50VAL | HG23 | 796 | 3.442 | 4.098 | 4.568 |
| 50VAL | C    | 797 | 3.431 | 4.451 | 4.747 |
| 50VAL | O    | 798 | 3.367 | 4.555 | 4.760 |
| 51VAL | N    | 799 | 3.560 | 4.446 | 4.785 |
| 51VAL | HN   | 800 | 3.612 | 4.362 | 4.773 |
| 51VAL | CA   | 801 | 3.635 | 4.559 | 4.832 |
| 51VAL | HA   | 802 | 3.577 | 4.644 | 4.864 |
| 51VAL | CB   | 803 | 3.713 | 4.530 | 4.957 |
| 51VAL | HB   | 804 | 3.766 | 4.437 | 4.928 |
| 51VAL | CG1  | 805 | 3.808 | 4.647 | 4.986 |
| 51VAL | HG11 | 806 | 3.886 | 4.665 | 4.908 |



|       |      |     |       |       |       |
|-------|------|-----|-------|-------|-------|
| 51VAL | HG12 | 807 | 3.753 | 4.741 | 5.006 |
| 51VAL | HG13 | 808 | 3.871 | 4.631 | 5.076 |
| 51VAL | CG2  | 809 | 3.619 | 4.516 | 5.078 |
| 51VAL | HG21 | 810 | 3.556 | 4.604 | 5.102 |
| 51VAL | HG22 | 811 | 3.552 | 4.431 | 5.052 |
| 51VAL | HG23 | 812 | 3.681 | 4.503 | 5.169 |
| 51VAL | C    | 813 | 3.719 | 4.609 | 4.720 |
| 51VAL | O    | 814 | 3.791 | 4.540 | 4.649 |
| 52GLY | N    | 815 | 3.712 | 4.742 | 4.704 |
| 52GLY | HN   | 816 | 3.648 | 4.795 | 4.759 |
| 52GLY | CA   | 817 | 3.762 | 4.822 | 4.596 |
| 52GLY | HA1  | 818 | 3.744 | 4.928 | 4.611 |
| 52GLY | HA2  | 819 | 3.864 | 4.788 | 4.597 |
| 52GLY | C    | 820 | 3.703 | 4.795 | 4.462 |
| 52GLY | O    | 821 | 3.584 | 4.768 | 4.448 |
| 53PRO | N    | 822 | 3.774 | 4.828 | 4.357 |
| 53PRO | CD   | 823 | 3.892 | 4.912 | 4.360 |
| 53PRO | HD1  | 824 | 3.985 | 4.853 | 4.378 |
| 53PRO | HD2  | 825 | 3.884 | 4.995 | 4.434 |
| 53PRO | CA   | 826 | 3.729 | 4.803 | 4.223 |
| 53PRO | HA   | 827 | 3.638 | 4.860 | 4.216 |
| 53PRO | CB   | 828 | 3.830 | 4.870 | 4.129 |
| 53PRO | HB1  | 829 | 3.910 | 4.803 | 4.092 |
| 53PRO | HB2  | 830 | 3.780 | 4.920 | 4.043 |
| 53PRO | CG   | 831 | 3.883 | 4.980 | 4.223 |
| 53PRO | HG1  | 832 | 3.988 | 5.008 | 4.200 |
| 53PRO | HG2  | 833 | 3.833 | 5.079 | 4.217 |
| 53PRO | C    | 834 | 3.693 | 4.663 | 4.190 |
| 53PRO | O    | 835 | 3.770 | 4.570 | 4.215 |
| 54LYS | N    | 836 | 3.576 | 4.645 | 4.127 |

|       |      |     |       |       |       |
|-------|------|-----|-------|-------|-------|
| 54LYS | HN   | 837 | 3.519 | 4.723 | 4.102 |
| 54LYS | CA   | 838 | 3.527 | 4.512 | 4.108 |
| 54LYS | HA   | 839 | 3.578 | 4.442 | 4.173 |
| 54LYS | CB   | 840 | 3.376 | 4.510 | 4.136 |
| 54LYS | HB1  | 841 | 3.325 | 4.581 | 4.067 |
| 54LYS | HB2  | 842 | 3.335 | 4.409 | 4.119 |
| 54LYS | CG   | 843 | 3.319 | 4.567 | 4.267 |
| 54LYS | HG1  | 844 | 3.384 | 4.526 | 4.347 |
| 54LYS | HG2  | 845 | 3.329 | 4.677 | 4.272 |
| 54LYS | CD   | 846 | 3.172 | 4.526 | 4.281 |
| 54LYS | HD1  | 847 | 3.163 | 4.420 | 4.311 |
| 54LYS | HD2  | 848 | 3.138 | 4.581 | 4.371 |
| 54LYS | CE   | 849 | 3.089 | 4.561 | 4.157 |
| 54LYS | HE1  | 850 | 3.090 | 4.667 | 4.125 |
| 54LYS | HE2  | 851 | 3.117 | 4.502 | 4.067 |
| 54LYS | NZ   | 852 | 2.944 | 4.536 | 4.177 |
| 54LYS | HZ1  | 853 | 2.885 | 4.528 | 4.092 |
| 54LYS | HZ2  | 854 | 2.923 | 4.455 | 4.239 |
| 54LYS | HZ3  | 855 | 2.910 | 4.619 | 4.230 |
| 54LYS | C    | 856 | 3.551 | 4.465 | 3.968 |
| 54LYS | O    | 857 | 3.550 | 4.346 | 3.938 |
| 55VAL | N    | 858 | 3.554 | 4.559 | 3.872 |
| 55VAL | HN   | 859 | 3.546 | 4.656 | 3.894 |
| 55VAL | CA   | 860 | 3.565 | 4.527 | 3.733 |
| 55VAL | HA   | 861 | 3.533 | 4.427 | 3.709 |
| 55VAL | CB   | 862 | 3.480 | 4.617 | 3.649 |
| 55VAL | HB   | 863 | 3.486 | 4.722 | 3.685 |
| 55VAL | CG1  | 864 | 3.512 | 4.599 | 3.500 |
| 55VAL | HG11 | 865 | 3.561 | 4.500 | 3.491 |
| 55VAL | HG12 | 866 | 3.423 | 4.598 | 3.433 |

|       |      |     |       |       |       |
|-------|------|-----|-------|-------|-------|
| 55VAL | HG13 | 867 | 3.576 | 4.684 | 3.469 |
| 55VAL | CG2  | 868 | 3.336 | 4.571 | 3.678 |
| 55VAL | HG21 | 869 | 3.330 | 4.464 | 3.650 |
| 55VAL | HG22 | 870 | 3.308 | 4.591 | 3.784 |
| 55VAL | HG23 | 871 | 3.271 | 4.625 | 3.606 |
| 55VAL | C    | 872 | 3.710 | 4.539 | 3.700 |
| 55VAL | O    | 873 | 3.775 | 4.637 | 3.738 |
| 56ARG | N    | 874 | 3.768 | 4.438 | 3.633 |
| 56ARG | HN   | 875 | 3.719 | 4.360 | 3.594 |
| 56ARG | CA   | 876 | 3.896 | 4.451 | 3.572 |
| 56ARG | HA   | 877 | 3.931 | 4.552 | 3.592 |
| 56ARG | CB   | 878 | 3.999 | 4.353 | 3.631 |
| 56ARG | HB1  | 879 | 4.100 | 4.374 | 3.591 |
| 56ARG | HB2  | 880 | 3.999 | 4.379 | 3.739 |
| 56ARG | CG   | 881 | 3.958 | 4.206 | 3.628 |
| 56ARG | HG1  | 882 | 3.855 | 4.184 | 3.662 |
| 56ARG | HG2  | 883 | 3.951 | 4.182 | 3.519 |
| 56ARG | CD   | 884 | 4.065 | 4.126 | 3.703 |
| 56ARG | HD1  | 885 | 4.044 | 4.017 | 3.706 |
| 56ARG | HD2  | 886 | 4.167 | 4.135 | 3.661 |
| 56ARG | NE   | 887 | 4.073 | 4.167 | 3.846 |
| 56ARG | HE   | 888 | 3.979 | 4.186 | 3.877 |
| 56ARG | CZ   | 889 | 4.178 | 4.210 | 3.922 |
| 56ARG | NH1  | 890 | 4.307 | 4.175 | 3.894 |
| 56ARG | HH11 | 891 | 4.323 | 4.117 | 3.814 |
| 56ARG | HH12 | 892 | 4.369 | 4.183 | 3.972 |
| 56ARG | NH2  | 893 | 4.154 | 4.270 | 4.042 |
| 56ARG | HH21 | 894 | 4.076 | 4.332 | 4.046 |
| 56ARG | HH22 | 895 | 4.236 | 4.309 | 4.085 |
| 56ARG | C    | 896 | 3.886 | 4.430 | 3.425 |

|       |     |     |       |       |       |
|-------|-----|-----|-------|-------|-------|
| 56ARG | O   | 897 | 3.798 | 4.360 | 3.375 |
| 57LYS | N   | 898 | 3.984 | 4.483 | 3.348 |
| 57LYS | HN  | 899 | 4.046 | 4.542 | 3.398 |
| 57LYS | CA  | 900 | 3.991 | 4.486 | 3.205 |
| 57LYS | HA  | 901 | 3.918 | 4.418 | 3.164 |
| 57LYS | CB  | 902 | 3.970 | 4.629 | 3.155 |
| 57LYS | HB1 | 903 | 3.868 | 4.658 | 3.188 |
| 57LYS | HB2 | 904 | 4.031 | 4.713 | 3.195 |
| 57LYS | CG  | 905 | 3.954 | 4.631 | 3.002 |
| 57LYS | HG1 | 906 | 4.049 | 4.611 | 2.948 |
| 57LYS | HG2 | 907 | 3.883 | 4.548 | 2.981 |
| 57LYS | CD  | 908 | 3.883 | 4.756 | 2.951 |
| 57LYS | HD1 | 909 | 3.862 | 4.746 | 2.843 |
| 57LYS | HD2 | 910 | 3.794 | 4.770 | 3.016 |
| 57LYS | CE  | 911 | 3.964 | 4.884 | 2.972 |
| 57LYS | HE1 | 912 | 3.970 | 4.897 | 3.082 |
| 57LYS | HE2 | 913 | 4.060 | 4.890 | 2.916 |
| 57LYS | NZ  | 914 | 3.884 | 4.991 | 2.909 |
| 57LYS | HZ1 | 915 | 3.945 | 5.071 | 2.934 |
| 57LYS | HZ2 | 916 | 3.886 | 4.985 | 2.805 |
| 57LYS | HZ3 | 917 | 3.792 | 5.004 | 2.956 |
| 57LYS | C   | 918 | 4.121 | 4.434 | 3.155 |
| 57LYS | O   | 919 | 4.222 | 4.485 | 3.205 |
| 58CYS | N   | 920 | 4.122 | 4.346 | 3.054 |
| 58CYS | HN  | 921 | 4.041 | 4.306 | 3.012 |
| 58CYS | CA  | 922 | 4.249 | 4.316 | 2.996 |
| 58CYS | HA  | 923 | 4.327 | 4.309 | 3.070 |
| 58CYS | CB  | 924 | 4.237 | 4.177 | 2.930 |
| 58CYS | HB1 | 925 | 4.203 | 4.096 | 2.997 |
| 58CYS | HB2 | 926 | 4.159 | 4.195 | 2.853 |

|       |      |     |       |       |       |
|-------|------|-----|-------|-------|-------|
| 58CYS | SG   | 927 | 4.379 | 4.107 | 2.840 |
| 58CYS | C    | 928 | 4.297 | 4.422 | 2.902 |
| 58CYS | O    | 929 | 4.222 | 4.461 | 2.813 |
| 59LEU | N    | 930 | 4.420 | 4.472 | 2.918 |
| 59LEU | HN   | 931 | 4.484 | 4.445 | 2.990 |
| 59LEU | CA   | 932 | 4.468 | 4.575 | 2.830 |
| 59LEU | HA   | 933 | 4.382 | 4.631 | 2.796 |
| 59LEU | CB   | 934 | 4.555 | 4.679 | 2.903 |
| 59LEU | HB1  | 935 | 4.649 | 4.631 | 2.937 |
| 59LEU | HB2  | 936 | 4.587 | 4.758 | 2.831 |
| 59LEU | CG   | 937 | 4.483 | 4.741 | 3.024 |
| 59LEU | HG   | 938 | 4.486 | 4.662 | 3.102 |
| 59LEU | CD1  | 939 | 4.570 | 4.856 | 3.078 |
| 59LEU | HD11 | 940 | 4.672 | 4.818 | 3.097 |
| 59LEU | HD12 | 941 | 4.578 | 4.941 | 3.006 |
| 59LEU | HD13 | 942 | 4.541 | 4.894 | 3.178 |
| 59LEU | CD2  | 943 | 4.338 | 4.787 | 3.001 |
| 59LEU | HD21 | 944 | 4.332 | 4.851 | 2.910 |
| 59LEU | HD22 | 945 | 4.269 | 4.700 | 3.004 |
| 59LEU | HD23 | 946 | 4.302 | 4.854 | 3.082 |
| 59LEU | C    | 947 | 4.549 | 4.513 | 2.722 |
| 59LEU | O    | 948 | 4.589 | 4.397 | 2.723 |
| 60ALA | N    | 949 | 4.584 | 4.587 | 2.615 |
| 60ALA | HN   | 950 | 4.547 | 4.679 | 2.625 |
| 60ALA | CA   | 951 | 4.629 | 4.534 | 2.490 |
| 60ALA | HA   | 952 | 4.572 | 4.451 | 2.451 |
| 60ALA | CB   | 953 | 4.622 | 4.631 | 2.370 |
| 60ALA | HB1  | 954 | 4.533 | 4.693 | 2.390 |
| 60ALA | HB2  | 955 | 4.709 | 4.699 | 2.378 |
| 60ALA | HB3  | 956 | 4.624 | 4.586 | 2.268 |

|       |      |     |       |       |       |
|-------|------|-----|-------|-------|-------|
| 60ALA | C    | 957 | 4.764 | 4.473 | 2.492 |
| 60ALA | O    | 958 | 4.791 | 4.384 | 2.411 |
| 61ASN | N    | 959 | 4.847 | 4.502 | 2.594 |
| 61ASN | HN   | 960 | 4.811 | 4.575 | 2.653 |
| 61ASN | CA   | 961 | 4.967 | 4.433 | 2.627 |
| 61ASN | HA   | 962 | 5.001 | 4.377 | 2.540 |
| 61ASN | CB   | 963 | 5.072 | 4.537 | 2.669 |
| 61ASN | HB1  | 964 | 5.175 | 4.496 | 2.673 |
| 61ASN | HB2  | 965 | 5.069 | 4.608 | 2.584 |
| 61ASN | CG   | 966 | 5.038 | 4.627 | 2.787 |
| 61ASN | OD1  | 967 | 4.931 | 4.609 | 2.844 |
| 61ASN | ND2  | 968 | 5.124 | 4.728 | 2.815 |
| 61ASN | HD21 | 969 | 5.108 | 4.790 | 2.892 |
| 61ASN | HD22 | 970 | 5.193 | 4.745 | 2.744 |
| 61ASN | C    | 971 | 4.961 | 4.319 | 2.723 |
| 61ASN | O    | 972 | 5.064 | 4.273 | 2.771 |
| 62GLY | N    | 973 | 4.844 | 4.258 | 2.750 |
| 62GLY | HN   | 974 | 4.755 | 4.286 | 2.715 |
| 62GLY | CA   | 975 | 4.847 | 4.142 | 2.834 |
| 62GLY | HA1  | 976 | 4.756 | 4.085 | 2.818 |
| 62GLY | HA2  | 977 | 4.921 | 4.076 | 2.791 |
| 62GLY | C    | 978 | 4.877 | 4.168 | 2.977 |
| 62GLY | O    | 979 | 4.946 | 4.096 | 3.050 |
| 63SER | N    | 980 | 4.819 | 4.281 | 3.023 |
| 63SER | HN   | 981 | 4.747 | 4.320 | 2.966 |
| 63SER | CA   | 982 | 4.822 | 4.336 | 3.155 |
| 63SER | HA   | 983 | 4.861 | 4.267 | 3.228 |
| 63SER | CB   | 984 | 4.911 | 4.460 | 3.169 |
| 63SER | HB1  | 985 | 4.927 | 4.481 | 3.277 |
| 63SER | HB2  | 986 | 5.011 | 4.435 | 3.129 |

|       |     |      |       |       |       |
|-------|-----|------|-------|-------|-------|
| 63SER | OG  | 987  | 4.856 | 4.578 | 3.112 |
| 63SER | HG1 | 988  | 4.876 | 4.589 | 3.019 |
| 63SER | C   | 989  | 4.679 | 4.355 | 3.193 |
| 63SER | O   | 990  | 4.590 | 4.372 | 3.110 |
| 64TRP | N   | 991  | 4.652 | 4.357 | 3.325 |
| 64TRP | HN  | 992  | 4.720 | 4.333 | 3.394 |
| 64TRP | CA  | 993  | 4.534 | 4.407 | 3.390 |
| 64TRP | HA  | 994  | 4.457 | 4.398 | 3.315 |
| 64TRP | CB  | 995  | 4.500 | 4.309 | 3.503 |
| 64TRP | HB1 | 996  | 4.579 | 4.310 | 3.582 |
| 64TRP | HB2 | 997  | 4.409 | 4.341 | 3.557 |
| 64TRP | CG  | 998  | 4.469 | 4.170 | 3.458 |
| 64TRP | CD1 | 999  | 4.550 | 4.061 | 3.475 |
| 64TRP | HD1 | 1000 | 4.654 | 4.051 | 3.501 |
| 64TRP | NE1 | 1001 | 4.482 | 3.949 | 3.434 |
| 64TRP | HE1 | 1002 | 4.513 | 3.857 | 3.436 |
| 64TRP | CE2 | 1003 | 4.357 | 3.985 | 3.390 |
| 64TRP | CD2 | 1004 | 4.344 | 4.122 | 3.408 |
| 64TRP | CE3 | 1005 | 4.222 | 4.175 | 3.380 |
| 64TRP | HE3 | 1006 | 4.197 | 4.279 | 3.395 |
| 64TRP | CZ3 | 1007 | 4.123 | 4.104 | 3.316 |
| 64TRP | HZ3 | 1008 | 4.025 | 4.149 | 3.309 |
| 64TRP | CZ2 | 1009 | 4.257 | 3.906 | 3.343 |
| 64TRP | HZ2 | 1010 | 4.268 | 3.799 | 3.341 |
| 64TRP | CH2 | 1011 | 4.138 | 3.967 | 3.310 |
| 64TRP | HH2 | 1012 | 4.057 | 3.910 | 3.267 |
| 64TRP | C   | 1013 | 4.539 | 4.548 | 3.437 |
| 64TRP | O   | 1014 | 4.641 | 4.603 | 3.478 |
| 65THR | N   | 1015 | 4.419 | 4.609 | 3.442 |
| 65THR | HN  | 1016 | 4.331 | 4.578 | 3.409 |

|       |           |       |       |       |
|-------|-----------|-------|-------|-------|
| 65THR | CA 1017   | 4.405 | 4.732 | 3.515 |
| 65THR | HA 1018   | 4.478 | 4.802 | 3.477 |
| 65THR | CB 1019   | 4.264 | 4.782 | 3.500 |
| 65THR | HB 1020   | 4.232 | 4.862 | 3.570 |
| 65THR | OG1 1021  | 4.169 | 4.678 | 3.522 |
| 65THR | HG1 1022  | 4.132 | 4.701 | 3.607 |
| 65THR | CG2 1023  | 4.247 | 4.841 | 3.360 |
| 65THR | HG21 1024 | 4.145 | 4.883 | 3.343 |
| 65THR | HG22 1025 | 4.316 | 4.927 | 3.353 |
| 65THR | HG23 1026 | 4.261 | 4.765 | 3.280 |
| 65THR | C 1027    | 4.443 | 4.733 | 3.659 |
| 65THR | O 1028    | 4.491 | 4.832 | 3.713 |
| 66ASP | N 1029    | 4.410 | 4.625 | 3.731 |
| 66ASP | HN 1030   | 4.362 | 4.551 | 3.686 |
| 66ASP | CA 1031   | 4.452 | 4.603 | 3.867 |
| 66ASP | HA 1032   | 4.489 | 4.696 | 3.907 |
| 66ASP | CB 1033   | 4.331 | 4.540 | 3.939 |
| 66ASP | HB1 1034  | 4.289 | 4.455 | 3.881 |
| 66ASP | HB2 1035  | 4.366 | 4.497 | 4.035 |
| 66ASP | CG 1036   | 4.233 | 4.649 | 3.979 |
| 66ASP | OD1 1037  | 4.272 | 4.765 | 4.009 |
| 66ASP | OD2 1038  | 4.111 | 4.617 | 3.982 |
| 66ASP | C 1039    | 4.572 | 4.515 | 3.872 |
| 66ASP | O 1040    | 4.593 | 4.418 | 3.799 |
| 67MET | N 1041    | 4.666 | 4.557 | 3.957 |
| 67MET | HN 1042   | 4.643 | 4.638 | 4.010 |
| 67MET | CA 1043   | 4.797 | 4.503 | 3.980 |
| 67MET | HA 1044   | 4.837 | 4.495 | 3.880 |
| 67MET | CB 1045   | 4.896 | 4.587 | 4.063 |
| 67MET | HB1 1046  | 4.993 | 4.539 | 4.086 |



|       |          |       |       |       |
|-------|----------|-------|-------|-------|
| 67MET | HB2 1047 | 4.925 | 4.680 | 4.008 |
| 67MET | CG 1048  | 4.836 | 4.641 | 4.192 |
| 67MET | HG1 1049 | 4.740 | 4.689 | 4.166 |
| 67MET | HG2 1050 | 4.798 | 4.549 | 4.240 |
| 67MET | SD 1051  | 4.925 | 4.748 | 4.311 |
| 67MET | CE 1052  | 4.971 | 4.888 | 4.204 |
| 67MET | HE1 1053 | 4.882 | 4.933 | 4.154 |
| 67MET | HE2 1054 | 5.005 | 4.966 | 4.275 |
| 67MET | HE3 1055 | 5.054 | 4.850 | 4.141 |
| 67MET | C 1056   | 4.800 | 4.361 | 4.024 |
| 67MET | O 1057   | 4.879 | 4.280 | 3.977 |
| 68ASP | N 1058   | 4.706 | 4.318 | 4.111 |
| 68ASP | HN 1059  | 4.647 | 4.382 | 4.160 |
| 68ASP | CA 1060  | 4.706 | 4.187 | 4.167 |
| 68ASP | HA 1061  | 4.784 | 4.136 | 4.111 |
| 68ASP | CB 1062  | 4.738 | 4.194 | 4.317 |
| 68ASP | HB1 1063 | 4.692 | 4.280 | 4.369 |
| 68ASP | HB2 1064 | 4.691 | 4.109 | 4.372 |
| 68ASP | CG 1065  | 4.889 | 4.197 | 4.337 |
| 68ASP | OD1 1066 | 4.938 | 4.092 | 4.287 |
| 68ASP | OD2 1067 | 4.955 | 4.289 | 4.393 |
| 68ASP | C 1068   | 4.575 | 4.119 | 4.147 |
| 68ASP | O 1069   | 4.476 | 4.177 | 4.102 |
| 69THR | N 1070   | 4.566 | 3.986 | 4.167 |
| 69THR | HN 1071  | 4.649 | 3.947 | 4.205 |
| 69THR | CA 1072  | 4.458 | 3.893 | 4.159 |
| 69THR | HA 1073  | 4.446 | 3.865 | 4.055 |
| 69THR | CB 1074  | 4.477 | 3.766 | 4.237 |
| 69THR | HB 1075  | 4.385 | 3.705 | 4.255 |
| 69THR | OG1 1076 | 4.538 | 3.791 | 4.362 |

|       |           |       |       |       |
|-------|-----------|-------|-------|-------|
| 69THR | HG1 1077  | 4.621 | 3.832 | 4.337 |
| 69THR | CG2 1078  | 4.572 | 3.672 | 4.162 |
| 69THR | HG21 1079 | 4.668 | 3.726 | 4.146 |
| 69THR | HG22 1080 | 4.606 | 3.584 | 4.221 |
| 69THR | HG23 1081 | 4.533 | 3.663 | 4.058 |
| 69THR | C 1082    | 4.328 | 3.947 | 4.207 |
| 69THR | O 1083    | 4.331 | 4.020 | 4.306 |
| 70PRO | N 1084    | 4.211 | 3.920 | 4.155 |
| 70PRO | CD 1085   | 4.190 | 3.832 | 4.042 |
| 70PRO | HD1 1086  | 4.257 | 3.744 | 4.048 |
| 70PRO | HD2 1087  | 4.208 | 3.884 | 3.945 |
| 70PRO | CA 1088   | 4.087 | 3.961 | 4.214 |
| 70PRO | HA 1089   | 4.089 | 4.063 | 4.249 |
| 70PRO | CB 1090   | 3.978 | 3.924 | 4.114 |
| 70PRO | HB1 1091  | 3.883 | 3.890 | 4.161 |
| 70PRO | HB2 1092  | 3.951 | 4.008 | 4.047 |
| 70PRO | CG 1093   | 4.039 | 3.799 | 4.048 |
| 70PRO | HG1 1094  | 4.011 | 3.710 | 4.107 |
| 70PRO | HG2 1095  | 3.987 | 3.787 | 3.950 |
| 70PRO | C 1096    | 4.070 | 3.882 | 4.340 |
| 70PRO | O 1097    | 4.080 | 3.760 | 4.342 |
| 71SER | N 1098    | 4.056 | 3.945 | 4.458 |
| 71SER | HN 1099   | 4.064 | 4.044 | 4.461 |
| 71SER | CA 1100   | 4.077 | 3.874 | 4.580 |
| 71SER | HA 1101   | 4.033 | 3.775 | 4.574 |
| 71SER | CB 1102   | 4.229 | 3.854 | 4.591 |
| 71SER | HB1 1103  | 4.262 | 3.815 | 4.690 |
| 71SER | HB2 1104  | 4.261 | 3.783 | 4.512 |
| 71SER | OG 1105   | 4.300 | 3.977 | 4.578 |
| 71SER | HG1 1106  | 4.310 | 3.991 | 4.484 |

|       |           |       |       |       |
|-------|-----------|-------|-------|-------|
| 71SER | C 1107    | 4.023 | 3.946 | 4.698 |
| 71SER | O 1108    | 4.019 | 3.896 | 4.810 |
| 72ARG | N 1109    | 3.961 | 4.065 | 4.685 |
| 72ARG | HN 1110   | 3.975 | 4.111 | 4.598 |
| 72ARG | CA 1111   | 3.928 | 4.149 | 4.796 |
| 72ARG | HA 1112   | 3.981 | 4.107 | 4.881 |
| 72ARG | CB 1113   | 3.991 | 4.289 | 4.784 |
| 72ARG | HB1 1114  | 3.961 | 4.337 | 4.689 |
| 72ARG | HB2 1115  | 3.959 | 4.362 | 4.861 |
| 72ARG | CG 1116   | 4.144 | 4.285 | 4.783 |
| 72ARG | HG1 1117  | 4.184 | 4.237 | 4.875 |
| 72ARG | HG2 1118  | 4.171 | 4.223 | 4.695 |
| 72ARG | CD 1119   | 4.208 | 4.424 | 4.771 |
| 72ARG | HD1 1120  | 4.316 | 4.411 | 4.747 |
| 72ARG | HD2 1121  | 4.156 | 4.491 | 4.699 |
| 72ARG | NE 1122   | 4.209 | 4.482 | 4.908 |
| 72ARG | HE 1123   | 4.198 | 4.423 | 4.988 |
| 72ARG | CZ 1124   | 4.238 | 4.614 | 4.921 |
| 72ARG | NH1 1125  | 4.278 | 4.698 | 4.821 |
| 72ARG | HH11 1126 | 4.285 | 4.671 | 4.725 |
| 72ARG | HH12 1127 | 4.347 | 4.767 | 4.841 |
| 72ARG | NH2 1128  | 4.253 | 4.664 | 5.047 |
| 72ARG | HH21 1129 | 4.217 | 4.613 | 5.125 |
| 72ARG | HH22 1130 | 4.245 | 4.763 | 5.059 |
| 72ARG | C 1131    | 3.784 | 4.160 | 4.830 |
| 72ARG | O 1132    | 3.706 | 4.204 | 4.745 |
| 73CYS | N 1133    | 3.741 | 4.111 | 4.947 |
| 73CYS | HN 1134   | 3.803 | 4.069 | 5.013 |
| 73CYS | CA 1135   | 3.603 | 4.112 | 4.984 |
| 73CYS | HA 1136   | 3.557 | 4.198 | 4.936 |

|       |           |       |       |       |
|-------|-----------|-------|-------|-------|
| 73CYS | CB 1137   | 3.551 | 3.976 | 4.935 |
| 73CYS | HB1 1138  | 3.568 | 3.981 | 4.825 |
| 73CYS | HB2 1139  | 3.629 | 3.907 | 4.973 |
| 73CYS | SG 1140   | 3.376 | 3.946 | 4.973 |
| 73CYS | C 1141    | 3.588 | 4.128 | 5.131 |
| 73CYS | O 1142    | 3.674 | 4.084 | 5.207 |
| 74VAL | N 1143    | 3.483 | 4.205 | 5.168 |
| 74VAL | HN 1144   | 3.422 | 4.220 | 5.091 |
| 74VAL | CA 1145   | 3.458 | 4.243 | 5.304 |
| 74VAL | HA 1146   | 3.535 | 4.312 | 5.335 |
| 74VAL | CB 1147   | 3.331 | 4.316 | 5.335 |
| 74VAL | HB 1148   | 3.320 | 4.340 | 5.443 |
| 74VAL | CG1 1149  | 3.335 | 4.449 | 5.258 |
| 74VAL | HG11 1150 | 3.241 | 4.503 | 5.284 |
| 74VAL | HG12 1151 | 3.425 | 4.512 | 5.275 |
| 74VAL | HG13 1152 | 3.340 | 4.428 | 5.149 |
| 74VAL | CG2 1153  | 3.212 | 4.226 | 5.296 |
| 74VAL | HG21 1154 | 3.199 | 4.139 | 5.364 |
| 74VAL | HG22 1155 | 3.121 | 4.287 | 5.310 |
| 74VAL | HG23 1156 | 3.219 | 4.196 | 5.189 |
| 74VAL | C 1157    | 3.455 | 4.131 | 5.403 |
| 74VAL | O 1158    | 3.426 | 4.014 | 5.378 |
| 75ARG | N 1159    | 3.496 | 4.160 | 5.527 |
| 75ARG | HN 1160   | 3.533 | 4.249 | 5.554 |
| 75ARG | CA 1161   | 3.478 | 4.072 | 5.638 |
| 75ARG | HA 1162   | 3.463 | 3.968 | 5.610 |
| 75ARG | CB 1163   | 3.599 | 4.058 | 5.732 |
| 75ARG | HB1 1164  | 3.615 | 4.152 | 5.788 |
| 75ARG | HB2 1165  | 3.577 | 3.978 | 5.806 |
| 75ARG | CG 1166   | 3.726 | 4.030 | 5.652 |

|       |           |       |       |       |
|-------|-----------|-------|-------|-------|
| 75ARG | HG1 1167  | 3.744 | 4.122 | 5.593 |
| 75ARG | HG2 1168  | 3.814 | 4.024 | 5.719 |
| 75ARG | CD 1169   | 3.739 | 3.913 | 5.554 |
| 75ARG | HD1 1170  | 3.665 | 3.927 | 5.472 |
| 75ARG | HD2 1171  | 3.835 | 3.895 | 5.501 |
| 75ARG | NE 1172   | 3.707 | 3.793 | 5.637 |
| 75ARG | HE 1173   | 3.710 | 3.801 | 5.737 |
| 75ARG | CZ 1174   | 3.665 | 3.672 | 5.590 |
| 75ARG | NH1 1175  | 3.673 | 3.637 | 5.458 |
| 75ARG | HH11 1176 | 3.744 | 3.688 | 5.409 |
| 75ARG | HH12 1177 | 3.653 | 3.543 | 5.432 |
| 75ARG | NH2 1178  | 3.616 | 3.575 | 5.672 |
| 75ARG | HH21 1179 | 3.630 | 3.600 | 5.768 |
| 75ARG | HH22 1180 | 3.600 | 3.483 | 5.637 |
| 75ARG | C 1181    | 3.362 | 4.121 | 5.719 |
| 75ARG | O 1182    | 3.293 | 4.043 | 5.786 |
| 76NME | N 1183    | 3.332 | 4.250 | 5.701 |
| 76NME | HN 1184   | 3.381 | 4.320 | 5.650 |
| 76NME | CH3 1185  | 3.211 | 4.306 | 5.754 |
| 76NME | HH31 1186 | 3.217 | 4.415 | 5.735 |
| 76NME | HH32 1187 | 3.117 | 4.275 | 5.704 |
| 76NME | HH33 1188 | 3.207 | 4.312 | 5.865 |
| 23ACE | CH3 1189  | 2.893 | 2.376 | 4.277 |
| 23ACE | HH31 1190 | 2.989 | 2.323 | 4.294 |
| 23ACE | HH32 1191 | 2.827 | 2.383 | 4.367 |
| 23ACE | HH33 1192 | 2.843 | 2.324 | 4.193 |
| 23ACE | C 1193    | 2.918 | 2.518 | 4.238 |
| 23ACE | O 1194    | 3.030 | 2.557 | 4.206 |
| 24ASP | N 1195    | 2.809 | 2.597 | 4.244 |
| 24ASP | HN 1196   | 2.725 | 2.559 | 4.280 |

|       |          |       |       |       |
|-------|----------|-------|-------|-------|
| 24ASP | CA 1197  | 2.804 | 2.720 | 4.172 |
| 24ASP | HA 1198  | 2.849 | 2.715 | 4.074 |
| 24ASP | CB 1199  | 2.656 | 2.763 | 4.159 |
| 24ASP | HB1 1200 | 2.610 | 2.771 | 4.260 |
| 24ASP | HB2 1201 | 2.650 | 2.865 | 4.116 |
| 24ASP | CG 1202  | 2.576 | 2.666 | 4.075 |
| 24ASP | OD1 1203 | 2.451 | 2.658 | 4.092 |
| 24ASP | OD2 1204 | 2.627 | 2.591 | 3.987 |
| 24ASP | C 1205   | 2.884 | 2.824 | 4.243 |
| 24ASP | O 1206   | 2.895 | 2.932 | 4.187 |
| 25ASP | N 1207   | 2.931 | 2.806 | 4.368 |
| 25ASP | HN 1208  | 2.903 | 2.727 | 4.421 |
| 25ASP | CA 1209  | 3.009 | 2.904 | 4.439 |
| 25ASP | HA 1210  | 3.002 | 3.007 | 4.407 |
| 25ASP | CB 1211  | 2.972 | 2.901 | 4.588 |
| 25ASP | HB1 1212 | 3.004 | 2.808 | 4.640 |
| 25ASP | HB2 1213 | 3.031 | 2.988 | 4.625 |
| 25ASP | CG 1214  | 2.826 | 2.935 | 4.612 |
| 25ASP | OD1 1215 | 2.751 | 2.991 | 4.527 |
| 25ASP | OD2 1216 | 2.786 | 2.911 | 4.729 |
| 25ASP | C 1217   | 3.151 | 2.861 | 4.431 |
| 25ASP | O 1218   | 3.238 | 2.924 | 4.491 |
| 26SER | N 1219   | 3.184 | 2.750 | 4.362 |
| 26SER | HN 1220  | 3.106 | 2.704 | 4.321 |
| 26SER | CA 1221  | 3.316 | 2.694 | 4.360 |
| 26SER | HA 1222  | 3.385 | 2.760 | 4.410 |
| 26SER | CB 1223  | 3.333 | 2.557 | 4.427 |
| 26SER | HB1 1224 | 3.425 | 2.503 | 4.394 |
| 26SER | HB2 1225 | 3.344 | 2.558 | 4.538 |
| 26SER | OG 1226  | 3.219 | 2.478 | 4.397 |

|       |           |       |       |       |
|-------|-----------|-------|-------|-------|
| 26SER | HG1 1227  | 3.149 | 2.486 | 4.462 |
| 26SER | C 1228    | 3.363 | 2.681 | 4.219 |
| 26SER | O 1229    | 3.484 | 2.676 | 4.194 |
| 27ASP | N 1230    | 3.270 | 2.685 | 4.123 |
| 27ASP | HN 1231   | 3.172 | 2.683 | 4.143 |
| 27ASP | CA 1232   | 3.307 | 2.736 | 3.994 |
| 27ASP | HA 1233   | 3.400 | 2.692 | 3.962 |
| 27ASP | CB 1234   | 3.194 | 2.719 | 3.891 |
| 27ASP | HB1 1235  | 3.097 | 2.770 | 3.909 |
| 27ASP | HB2 1236  | 3.228 | 2.745 | 3.788 |
| 27ASP | CG 1237   | 3.159 | 2.571 | 3.879 |
| 27ASP | OD1 1238  | 3.248 | 2.484 | 3.899 |
| 27ASP | OD2 1239  | 3.050 | 2.539 | 3.824 |
| 27ASP | C 1240    | 3.352 | 2.878 | 3.994 |
| 27ASP | O 1241    | 3.284 | 2.958 | 4.059 |
| 28VAL | N 1242    | 3.463 | 2.910 | 3.927 |
| 28VAL | HN 1243   | 3.520 | 2.844 | 3.879 |
| 28VAL | CA 1244   | 3.508 | 3.045 | 3.912 |
| 28VAL | HA 1245   | 3.494 | 3.098 | 4.005 |
| 28VAL | CB 1246   | 3.652 | 3.044 | 3.868 |
| 28VAL | HB 1247   | 3.668 | 2.965 | 3.791 |
| 28VAL | CG1 1248  | 3.691 | 3.177 | 3.801 |
| 28VAL | HG11 1249 | 3.797 | 3.166 | 3.769 |
| 28VAL | HG12 1250 | 3.638 | 3.198 | 3.706 |
| 28VAL | HG13 1251 | 3.687 | 3.251 | 3.884 |
| 28VAL | CG2 1252  | 3.748 | 3.017 | 3.984 |
| 28VAL | HG21 1253 | 3.847 | 3.013 | 3.936 |
| 28VAL | HG22 1254 | 3.761 | 3.099 | 4.058 |
| 28VAL | HG23 1255 | 3.721 | 2.924 | 4.040 |
| 28VAL | C 1256    | 3.419 | 3.123 | 3.822 |

|       |          |       |       |       |
|-------|----------|-------|-------|-------|
| 28VAL | O 1257   | 3.389 | 3.241 | 3.841 |
| 29TRP | N 1258   | 3.377 | 3.062 | 3.709 |
| 29TRP | HN 1259  | 3.401 | 2.970 | 3.680 |
| 29TRP | CA 1260  | 3.272 | 3.124 | 3.634 |
| 29TRP | HA 1261  | 3.306 | 3.226 | 3.624 |
| 29TRP | CB 1262  | 3.263 | 3.055 | 3.497 |
| 29TRP | HB1 1263 | 3.252 | 2.944 | 3.503 |
| 29TRP | HB2 1264 | 3.165 | 3.083 | 3.452 |
| 29TRP | CG 1265  | 3.385 | 3.095 | 3.420 |
| 29TRP | CD1 1266 | 3.500 | 3.026 | 3.396 |
| 29TRP | HD1 1267 | 3.504 | 2.918 | 3.407 |
| 29TRP | NE1 1268 | 3.590 | 3.099 | 3.324 |
| 29TRP | HE1 1269 | 3.679 | 3.069 | 3.296 |
| 29TRP | CE2 1270 | 3.530 | 3.220 | 3.300 |
| 29TRP | CD2 1271 | 3.409 | 3.225 | 3.366 |
| 29TRP | CE3 1272 | 3.336 | 3.340 | 3.370 |
| 29TRP | HE3 1273 | 3.238 | 3.345 | 3.415 |
| 29TRP | CZ3 1274 | 3.385 | 3.451 | 3.305 |
| 29TRP | HZ3 1275 | 3.332 | 3.544 | 3.298 |
| 29TRP | CZ2 1276 | 3.577 | 3.329 | 3.233 |
| 29TRP | HZ2 1277 | 3.670 | 3.329 | 3.178 |
| 29TRP | CH2 1278 | 3.502 | 3.443 | 3.232 |
| 29TRP | HH2 1279 | 3.533 | 3.528 | 3.173 |
| 29TRP | C 1280   | 3.145 | 3.124 | 3.712 |
| 29TRP | O 1281   | 3.103 | 3.030 | 3.779 |
| 30TRP | N 1282   | 3.068 | 3.234 | 3.705 |
| 30TRP | HN 1283  | 3.090 | 3.316 | 3.652 |
| 30TRP | CA 1284  | 2.938 | 3.265 | 3.756 |
| 30TRP | HA 1285  | 2.939 | 3.264 | 3.864 |
| 30TRP | CB 1286  | 2.897 | 3.413 | 3.737 |



|       |          |       |       |       |
|-------|----------|-------|-------|-------|
| 30TRP | HB1 1287 | 2.981 | 3.468 | 3.783 |
| 30TRP | HB2 1288 | 2.893 | 3.434 | 3.628 |
| 30TRP | CG 1289  | 2.772 | 3.459 | 3.803 |
| 30TRP | CD1 1290 | 2.649 | 3.477 | 3.746 |
| 30TRP | HD1 1291 | 2.635 | 3.468 | 3.639 |
| 30TRP | NE1 1292 | 2.560 | 3.519 | 3.842 |
| 30TRP | HE1 1293 | 2.466 | 3.543 | 3.841 |
| 30TRP | CE2 1294 | 2.620 | 3.524 | 3.965 |
| 30TRP | CD2 1295 | 2.750 | 3.481 | 3.943 |
| 30TRP | CE3 1296 | 2.834 | 3.476 | 4.050 |
| 30TRP | HE3 1297 | 2.938 | 3.454 | 4.032 |
| 30TRP | CZ3 1298 | 2.790 | 3.495 | 4.179 |
| 30TRP | HZ3 1299 | 2.859 | 3.502 | 4.261 |
| 30TRP | CZ2 1300 | 2.576 | 3.570 | 4.085 |
| 30TRP | HZ2 1301 | 2.476 | 3.605 | 4.104 |
| 30TRP | CH2 1302 | 2.663 | 3.548 | 4.190 |
| 30TRP | HH2 1303 | 2.625 | 3.579 | 4.286 |
| 30TRP | C 1304   | 2.837 | 3.166 | 3.708 |
| 30TRP | O 1305   | 2.836 | 3.133 | 3.590 |
| 31GLY | N 1306   | 2.754 | 3.112 | 3.799 |
| 31GLY | HN 1307  | 2.748 | 3.120 | 3.898 |
| 31GLY | CA 1308  | 2.646 | 3.034 | 3.745 |
| 31GLY | HA1 1309 | 2.684 | 2.962 | 3.674 |
| 31GLY | HA2 1310 | 2.604 | 2.994 | 3.836 |
| 31GLY | C 1311   | 2.530 | 3.102 | 3.681 |
| 31GLY | O 1312   | 2.541 | 3.213 | 3.629 |
| 32GLY | N 1313   | 2.411 | 3.039 | 3.680 |
| 32GLY | HN 1314  | 2.395 | 2.959 | 3.737 |
| 32GLY | CA 1315  | 2.290 | 3.090 | 3.625 |
| 32GLY | HA1 1316 | 2.211 | 3.024 | 3.659 |

|         |           |         |       |       |
|---------|-----------|---------|-------|-------|
| 32GLY   | HA2 1317  | 2.285   | 3.190 | 3.666 |
| 32GLY   | C 1318    | 2.281   | 3.111 | 3.478 |
| 32GLY   | O 1319    | 2.375   | 3.075 | 3.407 |
| 33NME   | N 1320    | 2.175   | 3.172 | 3.420 |
| 33NME   | HN 1321   | 2.097   | 3.204 | 3.472 |
| 33NME   | CH3 1322  | 2.160   | 3.200 | 3.281 |
| 33NME   | HH31 1323 | 2.056   | 3.189 | 3.243 |
| 33NME   | HH32 1324 | 2.209   | 3.298 | 3.262 |
| 33NME   | HH33 1325 | 2.224   | 3.132 | 3.220 |
| 7.40210 | 7.40210   | 7.40210 |       |       |

(a)

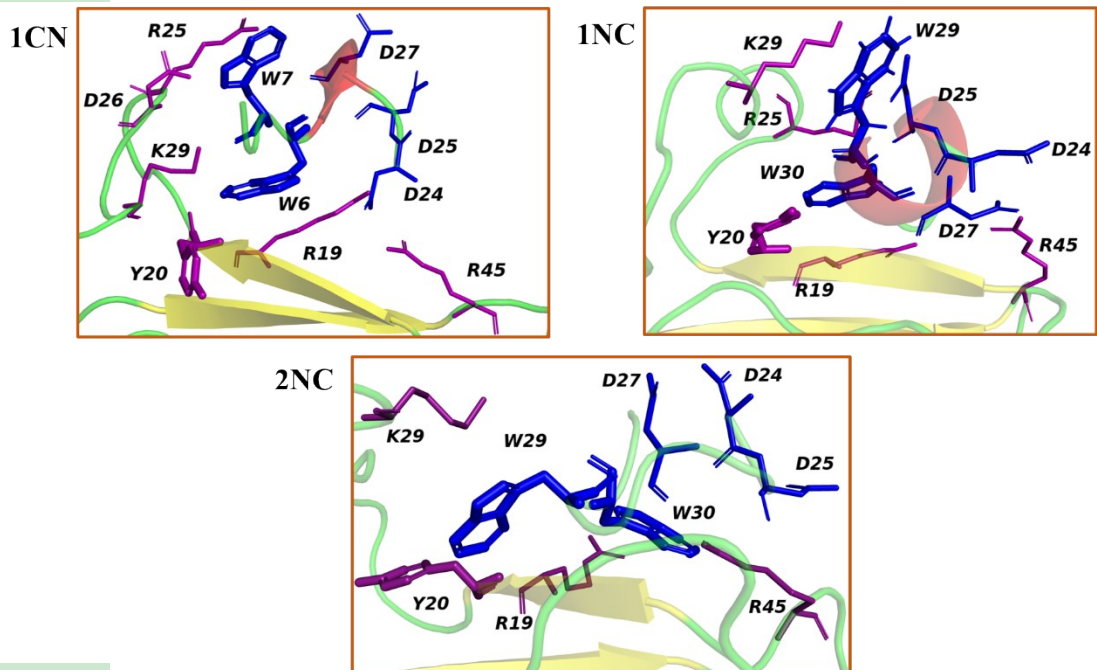

(b)

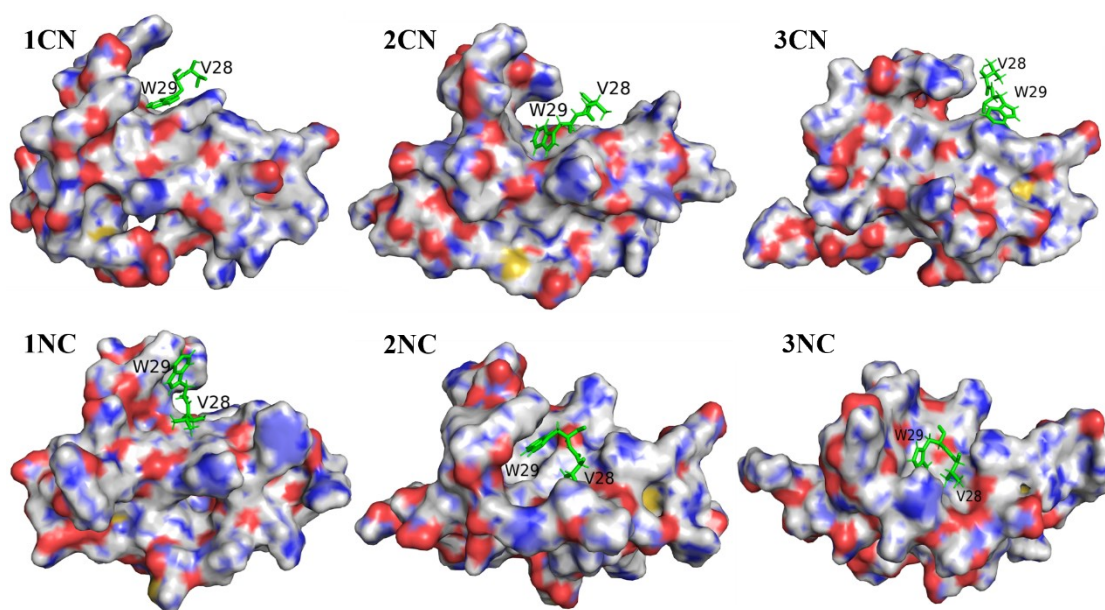

**Figure S1.** (a) Diagrams of major residue interactions of three complexes (1CN, 1NC, 2NC) of APP9mer-SD1. SD1 and APP9mer are presented in the form of Cartoon, and the key residues are shown in stick (blue residues belong to APP9mer, purple residues belong to SD1). (b) Binding mode of V28 and W29 of APP9mer (stick representation) interacting with the hydrophobic pocket of SD1 (molecular surface representation and different colors represent different elements).

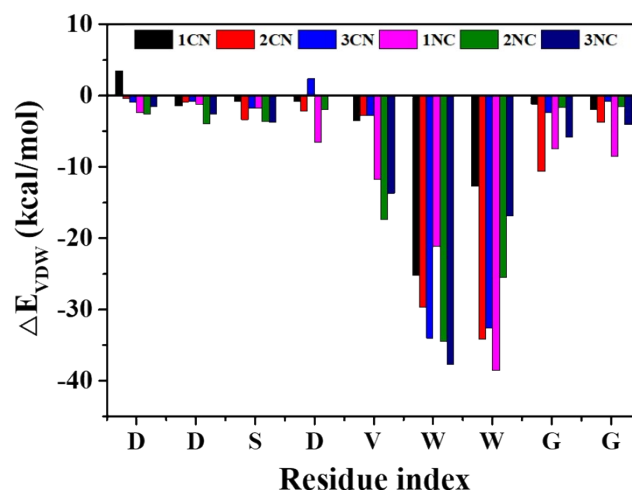

**Figure S2.** The contribution of each residue in the APP9mer of the six systems to the  $\Delta E_{VDW}$ .

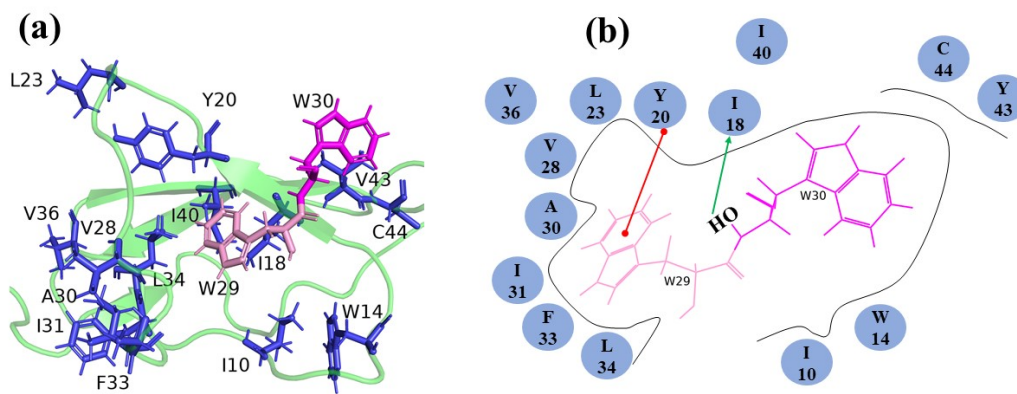

**Figure S3.** The positional relationship between residues W29, W30 of APP9mer (a) and the hydrophobic pocket in SD1 (indicated by blue balls) (b). The red and green lines stand for the  $\pi$ - $\pi$  stacking and H-bond interaction, respectively.

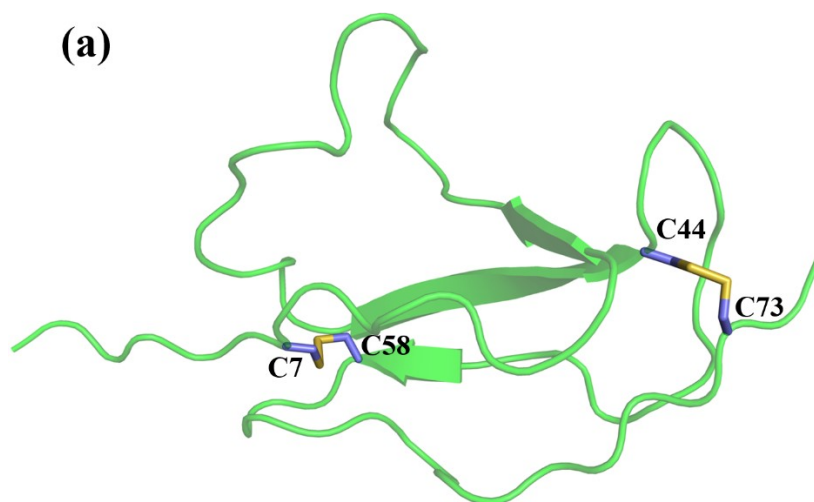

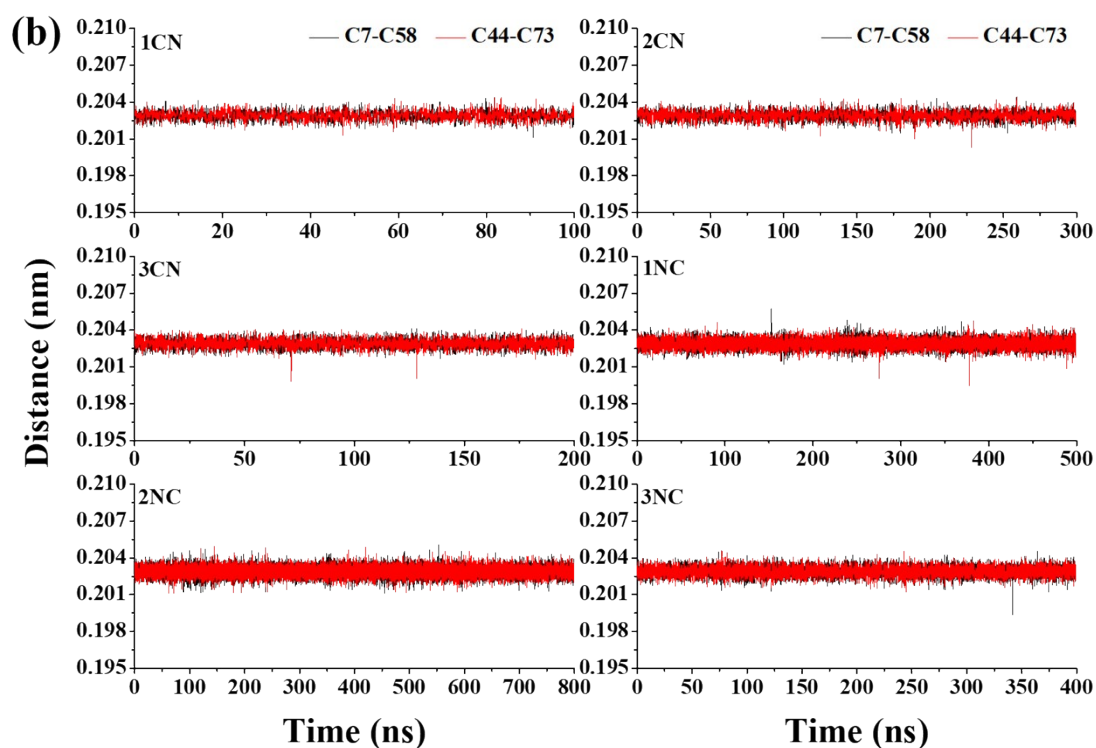

**Figure S4.** (a) Two disulfide bonds C7-C58, C44-C73 formed by Cys in SD1 (shown in yellow bars). (b) The distances between C7 and C58, and between C44 and C73, changed along with the simulation time during the whole process of MD simulation. Disulfide bonds C7-C58 and C44-C73 are represented by black and red curves respectively.

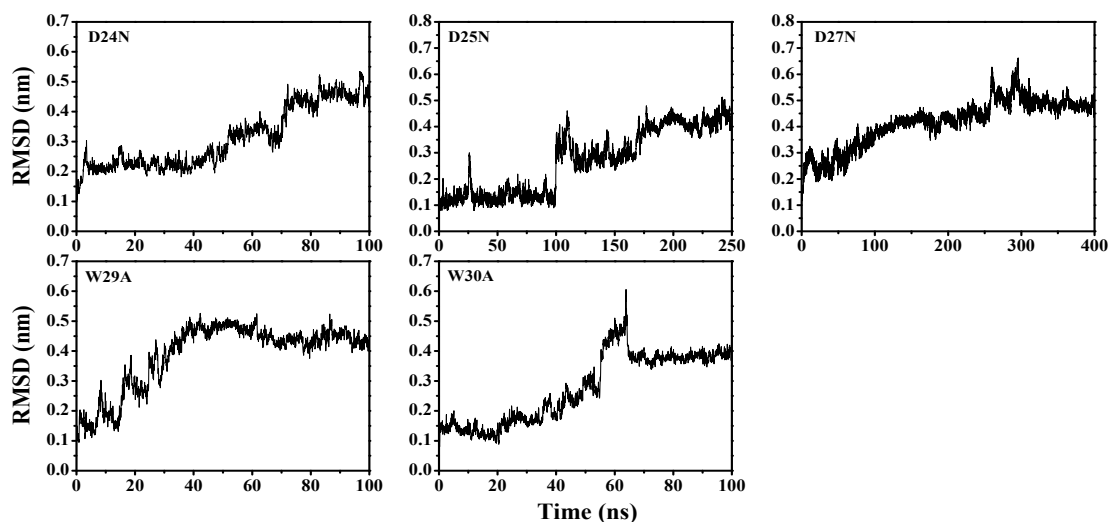

**Figure S5.** The RMSD curves of the mutant system 1CN-mut.

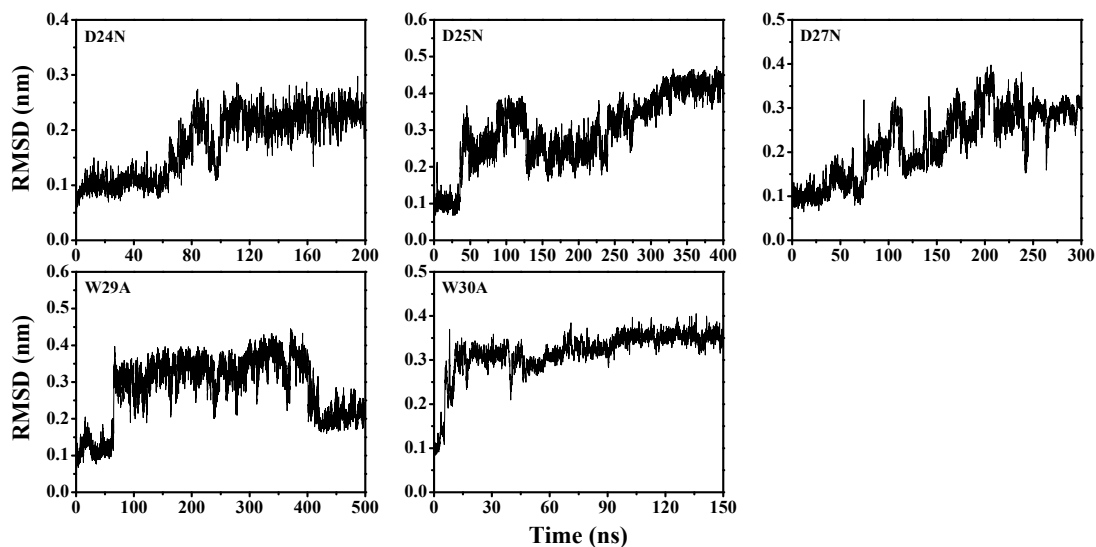

**Figure S6.** The RMSD curves of the mutant system 1NC-mut.

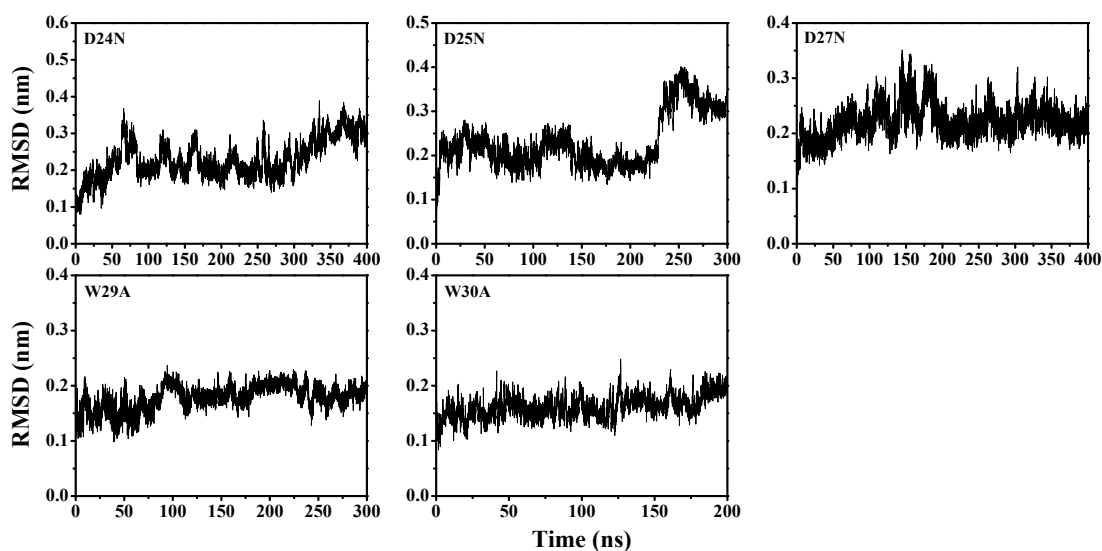

**Figure S7.** The RMSD curves of the mutant system 2NC-mut.

### 参考文献

1. Tsai, C.-J.; Kumar, S.; Ma, B.; Nussinov, R., Folding funnels, binding funnels, and protein function. *Protein Sci.* **1999**, *8* (6), 1181-1190.
2. Yang, L.-W.; Eyal, E.; Chennubhotla, C.; Jee, J.; Gronenborn, A. M.; Bahar, I., Insights into Equilibrium Dynamics of Proteins from Comparison of NMR and X-Ray Data with Computational Predictions. *Structure (London, England : 1993)* **2007**, *15* (6), 741-749.
3. Niesen, M. J. M.; Bhattacharya, S.; Grishammer, R.; Tate, C. G.; Vaidehi, N., Thermostabilization of the  $\beta$ 1-Adrenergic Receptor Correlates with Increased Entropy of the Inactive State. *J. Phys. Chem. B* **2013**, *117* (24), 7283-7291.
4. Singh, B.; Bulusu, G.; Mitra, A., Understanding the Thermostability and Activity of *Bacillus subtilis* Lipase Mutants: Insights from Molecular Dynamics Simulations. *J. Phys. Chem. B* **2015**, *119* (2), 392-409.
5. García, A. E.; Sanbonmatsu, K. Y., Exploring the energy landscape of a  $\beta$  hairpin in explicit solvent. *Proteins* **2001**, *42* (3), 345-354.

6. Tournier, A. L.; Smith, J. C., Principal Components of the Protein Dynamical Transition. *Phys. Rev. Lett.* **2003**, *91* (20), 208106.
7. Westerlund, A. M.; Delemotte, L., InfleCS: Clustering Free Energy Landscapes with Gaussian Mixtures. *J. Chem. Theory Comput.* **2019**, *15* (12), 6752-6759.
8. Matthes, D.; Gapsys, V.; Griesinger, C.; de Groot, B. L., Resolving the Atomistic Modes of Anle138b Inhibitory Action on Peptide Oligomer Formation. *ACS Chem. Neurosci.* **2017**, *8* (12), 2791-2808.
9. Chen, C.-J.; Liao, W.-L.; Chang, C.-T.; Lin, Y.-N.; Tsai, F.-J., Identification of Urinary Metabolite Biomarkers of Type 2 Diabetes Nephropathy Using an Untargeted Metabolomic Approach. *J. Proteome Res.* **2018**, *17* (11), 3997-4007.
10. Rahman, M. U.; Liu, H.; Wadood, A.; Chen, H. F., Allosteric mechanism of cyclopropylindolobenzazepine inhibitors for HCV NS5B RdRp via dynamic correlation network analysis. *Mol. Biosyst.* **2016**, *12* (11), 3280-3293.
11. Yu, H.; Fang, Y.; Lu, X.; Liu, Y.; Zhang, H., Combined 3D-QSAR, molecular docking, molecular dynamics simulation, and binding free energy calculation studies on the 5-hydroxy-2H-pyridazin-3-one derivatives as HCV NS5B polymerase inhibitors. *Chem. Biol. Drug Des.* **2014**, *83* (1), 89-105.
12. Martin, T. D.; Hill, E. H.; Whitten, D. G.; Chi, E. Y.; Evans, D. G., Oligomeric Conjugated Polyelectrolytes Display Site-Preferential Binding to an MS2 Viral Capsid. *Langmuir* **2016**, *32* (47), 12542-12551.
13. Wang, E.; Sun, H.; Wang, J.; Wang, Z.; Liu, H.; Zhang, J. Z. H.; Hou, T., End-Point Binding Free Energy Calculation with MM/PBSA and MM/GBSA: Strategies and Applications in Drug Design. *Chem. Rev.* **2019**, *119* (16), 9478-9508.
14. Miller, B. R.; McGee, T. D.; Swails, J. M.; Homeyer, N.; Gohlke, H.; Roitberg, A. E., MMPBSA.py: An Efficient Program for End-State Free Energy Calculations. *J. Chem. Theory Comput.* **2012**, *8* (9), 3314-3321.
15. Wakchaure, P. D.; Ghosh, S.; Ganguly, B., Revealing the Inhibition Mechanism of RNA-Dependent RNA Polymerase (RdRp) of SARS-CoV-2 by Remdesivir and Nucleotide Analogues: A Molecular Dynamics Simulation Study. *J. Phys. Chem. B* **2020**, *124* (47), 10641-10652.
16. Lee, M. R.; Duan, Y.; Kollman, P. A., Use of MM-PB/SA in estimating the free energies of proteins: application to native, intermediates, and unfolded villin headpiece. *Proteins* **2000**, *39* (4), 309-316.
17. Kumari, R.; Kumar, R.; Lynn, A., g\_mmpbsa—A GROMACS Tool for High-Throughput MM-PBSA Calculations. *J. Chem. Inf. Model.* **2014**, *54* (7), 1951-1962.
18. Gohlke, H.; Kiel, C.; Case, D. A., Insights into protein-protein binding by binding free energy calculation and free energy decomposition for the Ras-Raf and Ras-RalGDS complexes. *J. Mol. Biol.* **2003**, *330* (4), 891-913.
